# Supplementary material for: The larva and adult of Helicoverpa armigera use differential gustatory receptors to sense sucrose
Source: eLife. 2024 May 30;12:RP91711. doi: 10.7554/eLife.91711 (PMC11139476; doi:10.7554/eLife.91711)
Supplement: Figure 1—figure supplement 1—source data 1. — (Figure 1—figure supplement 1C) The electrophysiological responses of the medial sensilla styloconica on maxillary galea of H. armigera 5th instar larvae to test compounds. (Figure 1—figure supplement 1D) The electrophysiological responses of the lateral sensilla styloconica on maxillary galea of H. armigera 5th instar larvae to fucose, sucrose and their mixture. [file elife-91711-fig1-figsupp1-data1.xlsx]

## Sheet: Figure 1-Figure Supplement 1C
Figure 1-Figure Supplement 1C
	The electrophysiological responses of the medial sensilla styloconica on maxillary galea of H. armigera 5th-instar larvae to test compounds (spikes/s)
	Replicate	Xylose 10 mM	Trehalose 10mM	Sucrose 10 mM	Glucose 10 mM	Galactose 10 mM	Fucose 10 mM	Fructose 10 mM	Arabinose 10 mM	KCl 2mM
	1	25.75	3.5	0	0	0	1	17.5	0	26
	2	23.25	12	0	7.5	0	7	27.6667	5.75	19
	3	0	0	0	7.75	0	0	0	2	10.5
	4	60	6.5	0	0	0	2	14	0	6
	5	28	0	12	18	0	0	0.75	1.25	10.5
	6	33	7	4.5	4.25	21.5	0	3	7	12
	7	38	0	7.5	10	0	0	8.33333	0	15
	8	34.5	1	6	16.75	0	1.5	1	11.5	2
	9	13.75	7.5	2.25	0	9	1	7	7.5	10.5
	10	29.75	0	1.75	2	4.25	0	16.25	8	17
	11	27.5	0	0.75	1.25	12.25	0	14.75	0.25	40.5
	12	27.5	0	7.5	8.25	3.75	0.5	15	8.75	11
	13	36	0	8.5	0	2.5	2.5	1.25	4.75	6.25
	Data were analyzed with independent-samples t test, P < 0.05.

## Sheet: Figure 1-Figure Supplement 1D
Figure 1-Figure Supplement 1D
	The electrophysiological responses of the lateral sensilla styloconica on maxillary galea of H. armigera 5th-instar larvae to fucose, sucrose and their mixture (spikes/s)
	Replicate	Fucose 5mM	Sucrose 0.05mM	Mixture
	1	29.5	43.5	98
	2	49	33.5	52.5
	3	27	20.5	41
	4	23.5	45.5	63
	5	17	64.5	118.5
	6	75.5	27.5	54
	Mean	36.92	39.17	71.17
	SEM	8.878	6.37	12.36
	Data were analyzed with independent-samples t test, P < 0.05.
