# Supplementary material for: The larva and adult of Helicoverpa armigera use differential gustatory receptors to sense sucrose
Source: eLife. 2024 May 30;12:RP91711. doi: 10.7554/eLife.91711 (PMC11139476; doi:10.7554/eLife.91711)
Supplement: Figure 1—source data 1. — (Figure 1A) The electrophysiological responses of the lateral sensilla styloconica on the maxillary galea of H. armigera 5th instar larvae to test compounds. (Figure 1B) The electrophysiological responses of the lateral sensilla styloconica on the maxillary galea of H. armigera 5th instar larvae to sucrose and fucose at different concentrations. (Figure 1C) The electrophysiological responses of the contact chemosensilla on antennae of H. armigera female adults to test compounds. (Figure 1D) The electrophysiological responses of the contact chemosensilla on the antennae of H. armigera female adults to sucrose, fucose and fructose at different concentrations. (Figure 1E) The electrophysiological responses of the contact chemosensilla on the tarsi of H. armigera female adults to test compounds. (Figure 1F) The electrophysiological responses of the contact chmosensilla on the tarsi of H. armigera female adults to sucrose, fucose, and fructose at different concentrations. (Figure 1G) The electrophysiological responses of the contact chemosensilla on the proboscis of H. armigera female adults to test compounds. (Figure 1H) The electrophysiological responses of the contact chemosensilla on the proboscis of H. armigera female adults to sucrose, fucose, and fructose at different concentrations. [file elife-91711-fig1-data1.xlsx]

## Sheet: Figure 1A
Figure 1A
	The electrophysiological responses of the lateral sensilla styloconica on the maxillary galea of H. armigera 5-instar larvae to test compounds (spikes/s)
	Replicate	Xylose 10 mM	Trehalose 10 mM	Sucrose 10 mM	Glucose 10 mM	Galactose 10 mM	Fucose 10 mM	Fructose 10 mM	Arabinose 10 mM	KCl 2mM
	1	4.25	0	142	0	15	39	3	19	11.5
	2	10	8	121	3.25	0	12	0	14	38.5
	3	4	0	169.5	4.25	7.25	58.3333	19	0	10.5
	4	21.5	9.5	193	0	0	89.75	0	0	12.5
	5	7.66667	0	184.5	16.6667	0.666667	113	10.6667	2.75	4.5
	6	9	9	176.75	6	17.5	2	8.75	6.5	2.5
	7	9.75	0	123.333	11	1	0	18.5	0	0
	8	10	0	195	7.75	0	37.5	0	18	8
	9	9.25	0	192	6.5	40.75	8	0	9.5	1.33333
	10	25	5.75	199	1.25	0	23.75	20.5	0	10.5
	11	13	5.25	191.5	0	19.75	39	13.5	3.5	22.75
	12	4.5	5.75	192.75	9.25	16.75	60.6667	15.25	23.5	4.25
	13	12.75	12.5	122	7.75	0	76.5	19.5	12	7.25
	Data were analyzed by independent-samples t test, P < 0.05.

## Sheet: Figure 1B
Figure 1B
1	The electrophysiological responses of the lateral sensilla styloconica on the maxillary galea of H. armigera 5th-instar larvae to sucrose (spikes/s)
	Replicate	0 mM	0.01 mM	0.1 mM	1 mM	10 mM	100 mM
	1	9	8	89	113	78	166
	2	2	5	40	102	130	162
	3	0	88	13	100	100	149
	4	3	0	36	78	117	155
	5	3	2	88	121	115	147
	6	0	0	68	112	110	125
	7	8	0	60	129	126	130
	8	0	5	81	109	134	131
	Mean	3.125	13.5	59.38	108	113.8	145.6
	SEM	1.26	10.69	9.739	5.431	6.433	5.457
	Data were analyzed by one-way ANOVA with Tukey's HSD test, P < 0.05.
2	The electrophysiological responses of the lateral sensilla styloconica on the maxillary galea of H. armigera 5th-instar larvae to fucose (spikes/s)
	Replicate	0 mM	0.01 mM	0.1 mM	1 mM	10 mM	100 mM
	1	10	0	0	45	63	18
	2	9	11	4	13	17	20
	3	0	0	0	11	38	81
	4	0	0	4	9	20	42
	5	14	0	0	10	20	32
	6	0	0	0	4	54	86
	Mean	5.5	1.833	1.333	15.33	35.33	46.5
	SEM	2.553	1.833	0.8433	6.059	8.015	12.24
	Data were analyzed by one-way ANOVA with Tukey's HSD test, P < 0.05.

## Sheet: Figure 1C
Figure 1C
	The electrophysiological responses of the contact chemosensilla on antennae of H. armigera female adults to test compounds (spikes/s)
	Replicate	Xylose 10 mM	Trehalose 10 mM	Sucrose 10 mM	Glucose 10 mM	Galactose 10 mM	Fucose 10 mM	Fructose 10 mM	Arabinose 10 mM	KCl 2 mM
	1	20	0	32.5	18	9	53	28	23	19
	2	0	5	32.5	8	5	53	11	0	3
	3	3	5.5	4	15.5	2	45	32	1	22
	4	4	8.5	40	7	17	31	8	6	16
	5	3	6.5	25	13	0	44	18	13	9
	6	9	0	23	3	4	19	21	24.5	10
	7	0	0	31	8	1	17	24	2	9
	8	19	0.5	19.5	5	3	47.5	12	2	4
	9	3	0	5	17	2	24	13	0	3
	10	27	13	30	8	3	26	15	13	13
	11	6	4	4	7	0	14	11	5	0
	12	2	3.5	26	5	6	13	18	0	10
	13	3	2	19.5	3	6	15.5	19	5	2
	14	1	3.5	25	6	0	29	8	8	20
	15	8	0	25	3	5	34	23	2	4
	16	4	12.5	10.5	7	9	22	16	7	12
	17	6	2.5	38	3	0	49	20	3	5
	18	8	2.5	8	12	1	26	16	4	5
	19	0	0	22	2	0	14	28	1	0
	20	4	0	17.5	10	3	18	14	7	5
	21	7	0	26	12	0	26	9	0	22
	Data were analyzed by independent-samples t test, P < 0.05.

## Sheet: Figure 1D
Figure 1D
1	The electrophysiological responses of the contact chemosensilla on the antennae of H. armigera female adults to sucrose (spikes/s)
	Replicates	0 mM	0.01 mM	0.1 mM	1 mM	10 mM	100 mM
	1	13	13	0	13	34	17
	2	9	5	1	6	49	27
	3	0	8	7	14	15	29
	4	0	3	3	2	14.5	29
	5	22	41.5	52	38	5	72.5
	6	0	13	6	7	53.5	24
	7	7	3	1	1	11	20
	8	0	0	0	0	5	14
	9	1	1	2	4	0	19
	10	9	0	0	4	33	42
	11	7	3	7	3	38	35
	12	0	13	0	8	22	15
	13	7	1	4	17	21	39
	14	0	1	1	0	22	32.5
	15	3	5.5	1	15	14	78
	16	17	28	17	35	17	44
	17	4	6	1	15	15	18
	18	4	0	3	2	33	18
	19	3	0	2	3	7	13
	20	1	8	6	6	5	38
	21	17	7	5	6	0	43
	Mean	5.905	7.619	5.667	9.476	19.71	31.76
	SEM	1.431	2.232	2.469	2.272	3.338	3.85
	Data were analyzed by one-way ANOVA with Tukey's HSD test, P < 0.05.
2	The electrophysiological responses of the contact chemosensilla on the antennae of H. armigera female adults to fucose (spikes/s)
	Replicates	0 mM	0.01 mM	0.1 mM	1 mM	10 mM	100 mM
	1	9	4	3	17	43	47
	2	0	1	0	1	32	39
	3	22	2	0	10	18	15
	4	0	2	1	16	34	41.5
	5	7	2	17	27	20	50
	6	0	9	2	15	26	54
	7	1	0	0	23.5	36	48
	8	0	1	1	11	11	17
	9	7	5	9	21.5	81	70
	10	0	3	7	15.5	30	35
	11	4	1	1	1	27	25
	12	18	0	0	2	48	61
	13	4	1	2	8	38	31
	14	4	4	0	16	45	44
	15	3	0	1	17	18	16
	16	1	4	3	13	29	30
	17	0	3	10	8	17	21
	18	16	5	7	31.5	80	73
	19	9	6	2	18.5	22	20.5
	20	13	8.5	5	4	22	24
	21	4	4	8	18	26	31
	Mean	5.81	3.119	3.762	14.02	33.48	37.76
	SEM	1.43	0.5626	0.9683	1.804	4.016	3.777
	Data were analyzed by one-way ANOVA with Tukey's HSD test, P < 0.05.
3	The electrophysiological responses of the contact chemosensilla on the antennae of H. armigera female adults to fructose (spikes/s)
	Replicates	0 mM	0.01 mM	0.1 mM	1 mM	10 mM	100 mM
	1	13	8	5	4	9	38
	2	7	1	1	0	10	10
	3	3	9	15	7	17	13
	4	6	3	5	2	36	64
	5	1	4	2	13	51	57
	6	0	4	0	5	28	69
	7	4	5	15	24	24	61
	8	2	4	5	12	45	45
	9	0	1	2	6	11	33
	10	5	2	7	8	22	13
	11	1	2	4	3	11	22
	12	2	3	3	2	14	88
	13	0	5	2	11	30	75
	14	5	0	5	26	43	91
	15	7	3	5	12	36	40
	16	9	1	7	9	19	32
	17	1	2	12	0	2	18
	18	0	4	19	9	10	30
	19	4	6	2	2	12	30
	20	0	5	1	0	16	87
	21	8	1	2	34	25	68
	Mean	3.714	3.476	5.667	9	22.43	46.86
	SEM	0.7872	0.51	1.145	1.987	2.946	5.73
	Data were analyzed by one-way ANOVA with Tukey's HSD test, P < 0.05

## Sheet: Figure 1E
Figure 1E
	The electrophysiological responses of the contact chemosensilla on the tarsi of H. armigera female adults to test compounds (spikes/s)
	Replicate	Xylose 10 mM	Trehalose 10 mM	Sucrose 10 mM	Glucose 10 mM	Galactose 10 mM	Fucose 10 mM	Fructose 10 mM	Arabinose 10 mM	KCl 2 mM
	1	6	7	20	4	6	11	6	12.3333	6
	2	16	0	22.6667	15	5	10	10	5	11
	3	3	9.5	10	2	4	17	24	5	4
	4	0	1	5	12	0	13	6	1	4
	5	5	0	13	16	2	12	10	7	11
	6	0	0	19	2	1	22	4	3	2
	7	8	0.5	17.5	6	8	16	7	8	11
	8	14	0	18	6	10	8	19	5	5
	9	2	1.5	6	11	0	9	3	0	5
	10	10	0	17	10	2	15	5	0	4
	11	6	0	10	17	5	24	6	3	6
	12	8	0	11.5	6	0	8	4	5	11
	13	7	0	16	0	9	16	8	11	3
	14	4	0	23	14	3	18	2	3	2
	15	7	0	14	0	4	55	4	8	0
	Data were analyzed by independent-samples t test, P < 0.05.

## Sheet: Figure 1F
Figure 1F
1	The electrophysiological responses of the contact chmosensilla on the tarsi of H. armigera female adults to sucrose (spikes/s)
	Replicate	0 mM	0.01 mM	0.1 mM	1 mM	10 mM	100 mM
	1	13	8	9	3	1	18
	2	0	25	20	14	30	14
	3	25	17	19	19	27.5	25.5
	4	14	23	14	19	25	7
	5	17	23	14	22	12	20
	6	0	3	16	7	35	39
	7	11	19	26	29	25	24
	8	3	5	6	15	17	23
	9	0	10	7	6	7.5	3.5
	10	5	1	3	1	0	26
	11	0	0	0	1	17	24
	12	0	0	0	0	0	4
	13	7	0	1	0	0	0
	14	0	0	0	42	0	0
	15	16	18.5	10	26	26	27
	16	24	30	24	14	29	17
	17	4	10	17	19	15	15
	18	16.5	11	8	15	26	20
	19	0	3	0	14	24	54
	20	11	11	11	17	18	24
	21	6	1	2	1	19.5	26
	Mean	8.214	10.4	9.857	13.52	16.88	19.57
	SEM	1.788	2.1	1.809	2.406	2.5	2.8
	Data were analyzed by one-way ANOVA with Tukey's HSD test, P < 0.05.
2	The electrophysiological responses of the contact chemosensilla on the tarsi of H. armigera female adults to fucose (spikes/s)
	Replicate	0 mM	0.01 mM	0.1 mM	1 mM	10 mM	100 mM
	1	0	0	0	3	9	14
	2	5	4	3	3	10.5	14
	3	0	0	0	0	19	18
	4	5	2	3	0	20	15
	5	11	4	0	0	12	18
	6	4	0	4.5	10	14	18
	7	1	1	7	0	16	30
	8	8	11	11	7	23	33
	9	0	0	0	7	4	16
	10	3	8	9	6	8	12
	11	8	4	5	3	34	38
	12	8	9	16.5	26	29	41.5
	13	16	10	12.5	14	14	18
	14	5.5	9	1	5	12	12
	15	4	2.5	7	6	4	33
	16	8	3	5	7	42	16
	17	10	4	4.5	8	9	20
	18	4	12	5	3	15	14
	19	12.5	9	15	16	25	12
	20	8	8	6	8	0	24
	21	5	1	2	13	55	13
	Mean	6	4.833	5.571	6.905	17.83	20.45
	SEM	0.9265	0.8873	1.065	1.383	2.908	1.987
	Data were analyzed by one-way ANOVA with Tukey's HSD test, P < 0.05.
3	The electrophysiological responses of the contact chemosensilla on the tarsi of H. armigera female adults to fructose (spikes/s)
	Replicate	0 mM	0.01 mM	0.1 mM	1 mM	10 mM	100 mM
	1	2	1	1	0	1	9
	2	3	2	0	11	10	40
	3	2	0	3	2	6	20
	4	7	2	3	6	19	42
	5	5	1	0	7	14	32
	6	0	3	6	7	10	14
	7	0	3	2	6	8	15
	8	2	3	1	5	2	12
	9	6	2	3	7	5	33
	10	7	3	1	7	6	15
	11	5	8	6	8	12	23
	12	2	3	4	2	11	24
	13	0	1	2	4	13	26
	14	1	0	0	6	7	31
	15	0	0	0	0	2	10
	16	6	0	0	0	14	28
	17	6	1	9	1	26	90
	18	5	0	4	5	15	24
	19	16	7	8	7	18	18
	20	0	6	4	5	12	48
	21	0	0	0	7	32	78
	Mean	3.571	2.19	2.714	4.905	11.57	30.1
	SEM	0.8383	0.51	0.5942	0.6579	1.681	4.562
	Data were analyzed by one-way ANOVA with Tukey's HSD test, P < 0.05.

## Sheet: Figure 1G
Figure 1G
	The electrophysiological responses of the contact chemosensilla on the proboscis of H. armigera female adults to test compounds (spikes/s)
	Replicate	Xylose 10 mM	Trehalose 10 mM	Sucrose 10 mM	Glucose 10 mM	Galactose 10 mM	Fucose 10 mM	Fructose 10 mM	Arabinose 10 mM	KCl 2 mM
	1	0	0	0	0	0	0	0	0	0
	2	1	14.5	0	0	0	2	0	0	0
	3	3	0	17	0	0	22	3	0	0
	4	0	0	18	0	0	9	6	0	0
	5	0	0	6	0	0	25	30	0	0
	6	0	0	7	0	0	63	30	2	0
	7	0	0	0	0	0	12	41	0	0
	8	0	0	0	2	0	0	28	0	0
	9	0	22	0	0	0	0	31	0	0
	10	0	7	0	0	0	8	35	2	0
	11	4	0	0	0	1	0	26	0	0
	12	5	0	11	0	0	0	18	0	0
	13	0	0	12	0	1	0	17	0	1
	14	0	8.5	0	0	0	0	29	0	0
	15	0	1	15	0	0	0	0	0	0
	16	0	0	0	0	0	0	0	0	0
	17	0	0	0	0	0	29	0	0	0
	18	0	0	0	0	0	25	0	0	0
	19	0	0	8	0	0	0	1	0	0
	20	0	0	7	0	0	5	19	0	0
	21	0	0	13	1	4	0	0	0	0
	Mean	0.619	2.52381	10.19	0.1429	0.2857	9.524	14.95	0.1905	0.04762
	SEM	0.3198	1.27498	2.453	0.1043	0.1969	3.436	3.197	0.1313	0.04762
	Data were analyzed by independent-samples t test, P < 0.05.

## Sheet: Figure 1H
Figure 1H
1	The electrophysiological responses of the contact chemosensilla on the proboscis of H. armigera female adults to sucrose (spikes/s)
	Replicate	0 mM	0.01 mM	0.1 mM	1 mM	10 mM	100 mM
	1	0	0	0	2	7	49
	2	0	0	0	0	0	0
	3	1	0	0	0	4	25
	4	0	0	0	0	23	22
	5	0	0	0	0	13	50
	6	0	0	0	2	22	25
	7	0	0	3	5	4	45
	8	0	0	0	0	27	43
	9	0	0	0	0	12	25
	10	0	0	0	0	0	20
	11	0	0	0	3	27	76
	12	0	0	0	0	0	35
	13	0	0	1	2	8	29
	14	0	0	0	0	6	31
	15	0	0	0	0	5	42
	16	0	0	0	0	17	19
	17	0	0	0	10	5	41
	18	0	0	0	4	33	53
	19	0	0	0	0	15	44
	20	0	0	0	0	0	37
	21	0	0	0	0	0	35
	Mean	0.04762	0	0.1905	1.333	10.86	35.52
	SEM	0.04762	0	0.1483	0.5448	2.259	3.444
	Data were analyzed by one-way ANOVA with Tukey's HSD test, P < 0.05.
2	The electrophysiological responses of the contact chemosensilla on the proboscis of H. armigera female adults to fucose (spikes/s)
	Replicate	0 mM	0.01 mM	0.1 mM	1 mM	10 mM	100 mM
	1	0	0	0	0	0	48
	2	0	0	0	0	5	28
	3	0	0	0	1	15	74.5
	4	0	0	0	0	0	44
	5	0	0	0	0	5	65
	6	0	0	0	11	38	72
	7	0	0	0	0	14	40
	8	2	3	0	7	21	90
	9	0	0	0	0	2	6
	10	7	0	0	14	25	60
	11	0	0	0	0	0	44
	12	0	2	0	0	0	26
	13	0	0	0	0	0	92
	14	4	0	0	0	0	27
	15	0	0	0	0	35	48
	16	0	0	0	0	12	97
	17	1	0	0	0	11	54
	18	2	0	0	2	24	48
	19	0	0	0	0	0	23
	20	7	6	5	7	18	22
	21	0	0	0	0	0	39
	Mean	1.095	0.5238	0.2381	2	10.71	49.88
	SEM	0.4826	0.3209	0.2381	0.8944	2.657	5.421
	Data were analyzed by one-way ANOVA with Tukey's HSD test, P < 0.05.
3	The electrophysiological responses of the contact chemosensilla on the proboscis of H. armigera female adults to fructose (spikes/s)
	Replicate	0 mM	0.01 mM	0.1 mM	1 mM	10 mM	100 mM
	1	0	0	0	0	4	15
	2	0	7	0	0	5	24
	3	0	0	1	0	27	11
	4	0	0	0	0	26	55
	5	0	0	0	0	37	62
	6	0	0	0	0	21	59
	7	0	7	0	0	11	39
	8	0	0	2	0	25	21
	9	2	0	2	0	1	29
	10	0	0	0	0	23	46
	11	0	0	0	9	27	60
	12	0	2	0	0	29	57
	13	0	0	0	0	38	53
	14	0	0	2	0	26	37
	15	0	0	0	0	30	19
	16	0	0	2	9	4	16
	17	1	0	4	0	12	36
	18	0	0	0	0	15	24
	19		0	0	0	39	68
	20		0	0	0	28	67
	21		0	0	0	30	49
	Mean	0.1667	0.7619	0.619	0.8571	21.81	40.33
	SEM	0.1213	0.4624	0.2437	0.5907	2.546	4.1
	Data were analyzed by one-way ANOVA with Tukey's HSD test, P < 0.05.
