# Supplementary material for: The larva and adult of Helicoverpa armigera use differential gustatory receptors to sense sucrose
Source: eLife. 2024 May 30;12:RP91711. doi: 10.7554/eLife.91711 (PMC11139476; doi:10.7554/eLife.91711)
Supplement: Figure 2—figure supplement 1—source data 1. [file elife-91711-fig2-figsupp1-data1.xlsx]

## Sheet: Figure 2-Figure Supplement 1
Figure 2-Figure Supplement 1
1	Feeding area of H. armigera 5th-instar larvae in two-choice tests：0.01 mM Fructose vs Control
	Replicate	Control (cm2)	Fructose 0.01 mM (cm2)	Preference Index (PI)
	1	0.90592	0.91808	0.00666667
	2	0.93632	0.93024	-0.0032573
	3	0.93632	0.94848	0.00645161
	4	0.88768	0.85728	-0.0174216
	5	0.91808	0.87552	-0.0237288
	6	0.90592	0.92416	0.00996678
	7	0.93632	0.91808	-0.0098361
	8	0.91808	0.91808	0
	9	0.85728	0.95456	0.0536913
	10	0.8512	0.96672	0.0635451
	11	0.93632	0.79648	-0.0807018
	12	0.83904	0.84512	0.00361011
	13	0.89376	0.88768	-0.003413
	14	0.92416	0.91808	-0.0033003
	15	0.8512	0.9424	0.0508475
	16	0.91808	0.95456	0.0194805
	17	0.912	0.93024	0.00990099
	18	0.8816	0.87552	-0.0034602
	19	0.8816	0.93024	0.0268456
	20	0.92416	0.86336	-0.0340136
	Mean	0.900752	0.907744	0.00359368
	SEM	0.007034	0.009765	0.007131
	Data were analyzed by paired t test, P < 0.05.
2	Feeding area of H. armigera 5th-instar larvae in two-choice tests: 0.1 mM Fructose vs Control
	Replicate	Control (cm2)	Fructose 0.1 mM (cm2)	Preference Index (PI)
	1	0.93632	0.912	-0.0131579
	2	0.85728	0.83296	-0.0143885
	3	0.912	0.93632	0.0131579
	4	0.83296	0.87552	0.024911
	5	0.88768	0.95456	0.0363036
	6	0.95456	0.94848	-0.00319489
	7	1.05184	0.91808	-0.0679012
	8	0.85728	0.85728	0
	9	0.94848	0.85728	-0.0505051
	10	0.92416	0.90592	-0.00996678
	11	0.912	0.9424	0.0163934
	12	0.93632	0.86336	-0.0405405
	13	0.49248	0.91808	0.301724
	14	1.34368	0.93024	-0.181818
	15	0.68096	0.86336	0.11811
	16	0.87552	0.912	0.0204082
	17	0.8816	0.92416	0.023569
	18	0.912	0.89984	-0.00671141
	19	0.93024	0.912	-0.00990099
	20	0.912	0.89376	-0.010101
	Mean	0.901968	0.90288	0.00731955
	SEM	0.03453	0.007672	0.01986
	Data were analyzed by paired t test, P < 0.05.
3	Feeding area of H. armigera 5th-instar larvae in two-choice tests: 1 mM Fructose vs Control
	Replicate	Control (cm2)	Fructose 1 mM (cm2)	Preference Index (PI)
	1	0.9424	0.89376	-0.0264901
	2	0.92416	0.91808	-0.00330033
	3	0.88768	0.91808	0.016835
	4	0.83296	0.89376	0.0352113
	5	0.96672	0.86336	-0.0564784
	6	0.77216	0.87552	0.0627306
	7	0.9424	0.8816	-0.0333333
	8	0.76608	0.96672	0.115789
	9	0.89984	0.83904	-0.034965
	10	1.28896	0.86336	-0.19774
	11	0.93024	0.83904	-0.0515464
	12	0.96672	0.95456	-0.00632911
	13	0.86944	0.89984	0.0171821
	14	0.88768	0.95456	0.0363036
	15	0.94848	1.02144	0.037037
	16	0.89984	0.86944	-0.0171821
	17	0.80864	0.90592	0.0567376
	18	0.91808	0.91808	0
	19	0.8208	0.76	-0.0384615
	20	0.76608	0.97888	0.121951
	Mean	0.901968	0.900752	0.00169758
	SEM	0.02515	0.01298	0.01536
	Data were analyzed by paired t test, P < 0.05.
4	Feeding area of H. armigera 5th-instar larvae in two-choice tests: 10 mM Fructose vs Control
	Replicate	Control (cm2)	Fructose 10 mM (cm2)	Preference Index (PI)
	1	0.7296	0.88768	0.0977444
	2	0.81472	0.8208	0.00371747
	3	0.76	0.86944	0.0671642
	4	0.8208	0.912	0.0526316
	5	0.8512	0.86944	0.0106007
	6	0.89984	1.4288	0.227154
	7	0.8512	0.9424	0.0508475
	8	0.85728	0.96672	0.06
	9	0.93632	0.93632	0
	10	0.88768	0.8512	-0.020979
	11	0.90592	0.912	0.00334448
	12	0.82688	0.92416	0.0555556
	13	0.83904	0.9424	0.0580205
	14	0.85728	0.90592	0.0275862
	15	0.5776	1.00928	0.272031
	16	0.83296	0.86944	0.0214286
	17	0.9424	0.89376	-0.0264901
	18	0.77824	0.9728	0.111111
	19	0.62016	0.84512	0.153527
	20	0.87552	0.91808	0.0237288
	Mean	0.823232	0.933888	0.0624362
	SEM	0.02098	0.02806	0.01748
	Data were analyzed by paired t test, P < 0.05.
5	Feeding area of H. armigera 5th-instar larvae in two-choice tests: 100 mM Fructose vs Control
	Replicate	Control (cm2)	Fructose 100 mM (cm2)	Preference Index (PI)
	1	0.97888	0.8208	-0.0878378
	2	0.85728	0.93024	0.0408163
	3	0.91808	0.74176	-0.106227
	4	0.9424	0.74176	-0.119134
	5	0.76	0.93632	0.103943
	6	0.78432	1.56256	0.331606
	7	0.22496	1.5808	0.750842
	8	0.91808	0.8512	-0.0378007
	9	0.83296	1.48352	0.28084
	10	1.0336	0.96064	-0.0365854
	11	0.60192	0.95456	0.226562
	12	0.29184	1.5808	0.688312
	13	0.95456	1.52608	0.230392
	14	0.82688	0.92416	0.0555556
	15	0.85728	0.94848	0.0505051
	16	0.8512	1.52608	0.283887
	17	0.70528	0.95456	0.150183
	18	0.76	0.87552	0.070632
	19	0.82688	1.11264	0.147335
	20	0.7904	0.89376	0.0613718
	Mean	0.78584	1.09531	0.15426
	SEM	0.04608	0.06971	0.05238
	Data were analyzed by paired t test, P < 0.05.
