# Supplementary material for: The larva and adult of Helicoverpa armigera use differential gustatory receptors to sense sucrose
Source: eLife. 2024 May 30;12:RP91711. doi: 10.7554/eLife.91711 (PMC11139476; doi:10.7554/eLife.91711)
Supplement: Figure 2—source data 1. — (Figure 2A) Feeding area of H. armigera 5th instar larvae in two-choice tests of eight sugars. (Figure 2B) Feeding area of H. armigera 5th instar larvae in two-choice tests of sucrose at different concentrations. (Figure 2C) Proboscis extension reflex (PER) in adult females upon antennal stimulation by eight sugars. (Figure 2D) PER in adult females upon tarsal stimulation by eight sugars. (Figure 2E) PER in adult females upon antennal stimulation by different concentrations of sucrose, fucose, and fructose. (Figure 2F) PER in adult females upon tarsal stimulation by different concentrations of sucrose, fucose, and fructose. [file elife-91711-fig2-data1.xlsx]

## Sheet: Figure 2A
Figure 2A
1	Feeding area of H. armigera 5th-instar larvae in two-choice test: Xylose vs Control
	Replicate	Control (cm2)	Xylose 10 mM (cm2)	Preference Index (PI)
	1	0.99104	0.9424	-0.0251572
	2	0.9728	0.99712	0.0123457
	3	0.93632	1.10048	0.080597
	4	0.97888	0.93632	-0.0222222
	5	0.95456	0.93632	-0.0096463
	6	0.95456	0.89376	-0.0328947
	7	0.92416	0.83904	-0.0482759
	8	1.03968	0.8816	-0.0822785
	9	0.93024	0.93632	0.00325733
	10	0.92416	0.95456	0.0161812
	11	1.40448	0.97888	-0.178571
	12	1.02144	1.02144	0
	13	0.86944	0.9424	0.0402685
	14	0.9728	0.98496	0.00621118
	15	0.95456	0.9424	-0.00641026
	16	1.00928	0.89984	-0.0573248
	17	0.89984	0.85728	-0.0242215
	18	0.90592	0.6992	-0.128788
	19	0.61408	1.01536	0.246269
	20	0.912	0.97888	0.0353698
	Mean	0.958512	0.936928	-0.00876457
	SEM	0.03046	0.0184	0.01869
	Data were analyzed with paired t test, P < 0.05.
2	Feeding area of H. armigera 5th-instar larvae in two-choice test: Trehalose vs Control
	Replicate	Control (cm2)	Trehalose 10 mM (cm2)	Preference Index (PI)
	1	0.88374	0.908064	0.0135751
	2	0.90442	0.950624	0.0249072
	3	0.93846	0.905632	-0.0178017
	4	0.964	0.937248	-0.0140708
	5	0.91901	0.943328	0.0130578
	6	0.9105	0.906848	-0.00200952
	7	0.8728	0.944544	0.0394774
	8	1.06858	0.966432	-0.0501953
	9	1.16829	0.893472	-0.133293
	10	0.93238	0.929952	-0.00130374
	11	0.91901	0.931168	0.00657126
	12	0.94819	0.900768	-0.025648
	13	0.87523	0.887392	0.00689995
	14	0.67094	0.835104	0.109003
	15	0.93846	0.912928	-0.0137907
	16	0.91414	0.919008	0.00265554
	17	0.94576	0.904416	-0.022346
	18	0.88374	0.901984	0.0102166
	19	0.9032	0.926304	0.0126286
	20	0.95427	0.942112	-0.00641116
	Mean	0.9258	0.9174	-0.002394
	SEM	0.02039	0.006415	0.009849
	Data were analyzed with paired t test, P < 0.05.
3	Feeding area of H. armigera 5th-instar larvae in two-choice test: Sucrose vs Control
	Replicate	Control (cm2)	Sucrose 10 mM (cm2)	Preference Index (PI)
	1	0.87552	0.86336	-0.00699301
	2	0.8512	1.43488	0.255319
	3	0.88768	0.97888	0.0488599
	4	0.89984	1.33152	0.19346
	5	0.86944	0.97888	0.0592105
	6	0.8816	0.8512	-0.0175439
	7	0.89376	0.89984	0.00338983
	8	0.84512	0.85728	0.00714286
	9	0.8512	0.84512	-0.00358423
	10	0.87552	0.83296	-0.024911
	11	0.89984	0.87552	-0.0136986
	12	0.82688	1.4592	0.276596
	13	0.62016	1.40448	0.387387
	14	0.89376	1.08224	0.0953846
	15	0.87552	1.07616	0.102804
	16	0.86944	1.19776	0.158824
	17	0.4256	1.0944	0.44
	18	0.912	1.1856	0.130435
	19	0.86336	1.36192	0.224044
	20	0.86944	0.8816	0.00694444
	Mean	0.839344	1.07464	0.116153
	SEM	0.02563	0.04978	0.0313
	Data were analyzed by paired t test, P < 0.05.
4	Feeding area of H. armigera 5th-instar larvae in two-choice test: Glucose vs Control
	Replicate	Control (cm2)	Glucose 10 mM (cm2)	Preference Index (PI)
	1	0.93024	1.05792	0.0642202
	2	0.86944	0.98496	0.0622951
	3	0.85728	0.93632	0.0440678
	4	0.8512	0.95456	0.0572391
	5	0.95456	0.93024	-0.0129032
	6	0.93632	1.05792	0.0609756
	7	0.93024	0.92416	-0.00327869
	8	0.85728	0.96064	0.0568562
	9	0.96672	0.95456	-0.00632911
	10	0.93632	0.93024	-0.00325733
	11	0.9728	0.9728	0
	12	1.02144	0.6688	-0.208633
	13	1.00928	0.98496	-0.0121951
	14	0.99104	1.02752	0.0180723
	15	1.01536	1.3376	0.136951
	16	0.17024	1.5808	0.805556
	17	0.93024	0.76608	-0.0967742
	18	1.0944	0.83296	-0.135647
	19	0.84512	0.8816	0.0211268
	20	1.5808	0.13376	-0.843972
	Mean	0.936016	0.94392	0.000218517
	SEM	0.05342	0.06024	0.06225
	Data were analyzed by paired t test, P < 0.05.
5	Feeding area of H. armigera 5th-instar larvae in two-choice test: Galactose vs Control
	Replicate	Control (cm2)	Galactose 10 mM (cm2)	Preference Index (PI)
	1	0.91808	0.95456	0.0194805
	2	1.03968	0.93024	-0.0555556
	3	0.96672	0.99104	0.0124224
	4	0.93024	1.13088	0.0973451
	5	0.82688	0.9424	0.0652921
	6	0.9424	1.0032	0.03125
	7	1.01536	0.93024	-0.04375
	8	0.99104	1.1552	0.0764873
	9	1.0944	0.95456	-0.0682493
	10	0.8816	0.96064	0.0429043
	11	0.912	0.96064	0.025974
	12	1.05792	0.96064	-0.0481928
	13	1.0032	0.97888	-0.0122699
	14	0.98496	0.96672	-0.00934579
	15	0.79648	1.04576	0.135314
	16	0.84512	0.87552	0.0176678
	17	0.94848	0.96064	0.00636943
	18	0.96064	0.93632	-0.0128205
	19	0.94848	0.95456	0.00319489
	20	0.8512	0.96672	0.0635452
	Mean	0.945744	0.977968	0.0173531
	SEM	0.0176	0.01463	0.01177
	Data were analyzed by paired t test, P < 0.05.
6	Feeding area of H. armigera 5th-instar larvae in two-choice test: Fucose vs Control
	Replicate	Control (cm2)	Fucose 10 mM (cm2)	Preference Index (PI)
	1	1.02752	0.89984	-0.0662461
	2	1.00928	0.99712	-0.00606061
	3	0.89984	0.74784	-0.0922509
	4	0.43776	1.47744	0.542857
	5	1.14912	0.8816	-0.131737
	6	0.93024	0.89376	-0.02
	7	0.99104	0.97888	-0.00617284
	8	0.9424	0.9728	0.015873
	9	1.0944	0.92416	-0.0843373
	10	0.86336	0.93632	0.0405405
	11	1.00928	0.90592	-0.0539683
	12	0.90592	0.92416	0.00996678
	13	0.98496	1.02752	0.021148
	14	0.84512	0.8512	0.00358423
	15	0.96672	0.89376	-0.0392157
	16	0.9424	0.75392	-0.111111
	17	0.89984	0.85728	-0.0242215
	18	0.82688	0.84512	0.0109091
	19	0.9424	0.95456	0.00641026
	20	0.89376	0.83296	-0.0352113
	Mean	0.928112	0.927808	-0.000962149
	SEM	0.03137	0.03314	0.03051
	Data were analyzed by paired t test, P < 0.05.
7	Feeding area of H. armigera 5th-instar larvae in two-choice test: Fructose vs Control
	Replicate	Control (cm2)	Fructose 10 mM (cm2)	Preference Index (PI)
	1	0.88768	0.912	0.0135135
	2	0.89984	0.86944	-0.0171821
	3	0.78432	0.9424	0.0915493
	4	0.89376	1.19776	0.145349
	5	0.96064	1.22208	0.119777
	6	0.93632	0.91808	-0.00983607
	7	0.8208	0.9424	0.0689655
	8	0.91808	1.07008	0.0764526
	9	1.02144	0.87552	-0.0769231
	10	0.8208	1.064	0.129032
	11	0.89376	0.79648	-0.057554
	12	0.76	0.98496	0.12892
	13	0.87552	1.02144	0.0769231
	14	0.83904	0.80864	-0.0184502
	15	0.96064	1.05184	0.0453172
	16	0.83904	0.80864	-0.0184502
	17	0.9424	1.20384	0.121813
	18	0.87552	1.10048	0.113846
	19	0.86944	1.0944	0.114551
	20	0.70528	0.97888	0.162455
	Mean	0.875216	0.993168	0.0605034
	SEM	0.01674	0.02943	0.01624
	Data were analyzed by paired t test, P < 0.05.
8	Feeding area of H. armigera 5th-instar larvae in two-choice test: Arabinose vs Control
	Replicate	Control (cm2)	Arabinose 10 mM (cm2)	Preference Index (PI)
	1	0.83296	1.02752	0.104575
	2	0.96064	0.96672	0.00315457
	3	0.9424	0.93632	-0.00323625
	4	1.01536	0.99712	-0.00906344
	5	0.93632	0.83296	-0.0584192
	6	1.10048	0.63232	-0.270175
	7	0.93632	0.76	-0.103943
	8	0.9424	0.91808	-0.0130719
	9	0.96064	0.9728	0.00628931
	10	0.83904	0.9424	0.0580205
	11	0.86336	0.91808	0.0307167
	12	0.89984	0.96064	0.0326797
	13	0.89984	1.0032	0.0543131
	14	0.9424	0.91808	-0.0130719
	15	0.86336	0.93024	0.0372881
	16	0.99104	0.89376	-0.0516129
	17	0.91808	0.92416	0.00330033
	18	0.97888	1.02144	0.0212766
	19	0.93024	0.94848	0.00970874
	20	0.76608	0.80256	0.0232558
	Mean	0.925984	0.915344	-0.00690075
	SEM	0.01622	0.02134	0.0171
	Data were analyzed by paired t test, P < 0.05.
									Feeding area of H. armigera 5th-instar larvae in two-choice test (Extended Data Fig. 2)						Table Analyzed	fructose 100 mM 统计分析
									Treatment	Control (cm2)	Fructose 100 mM (cm2)	Preference Index (PI)
									Replicate 1	0.97888	0.8208	-0.0878378			Column B	100 mM fructose
									Replicate 2	0.85728	0.93024	0.0408163			vs.	vs.
									Replicate 3	0.91808	0.74176	-0.106227			Column A	control
									Replicate 4	0.9424	0.74176	-0.119134
									Replicate 5	0.76	0.93632	0.103943			Paired t test
									Replicate 6	0.78432	1.56256	0.331606			P value	0.0062
									Replicate 7	0.22496	1.5808	0.750842			P value summary	**
									Replicate 8	0.91808	0.8512	-0.0378007			Significantly different (P < 0.05)?	Yes
									Replicate 9	0.83296	1.48352	0.28084			One- or two-tailed P value?	Two-tailed
									Replicate 10	1.0336	0.96064	-0.0365854			t, df	t=3.075, df=19
									Replicate 11	0.60192	0.95456	0.226562			Number of pairs	20
									Replicate 12	0.29184	1.5808	0.688312
									Replicate 13	0.95456	1.52608	0.230392			How big is the difference?
									Replicate 14	0.82688	0.92416	0.0555556			Mean of differences (B - A)	0.3095
									Replicate 15	0.85728	0.94848	0.0505051			SD of differences	0.45
									Replicate 16	0.8512	1.52608	0.283887			SEM of differences	0.1006
									Replicate 17	0.70528	0.95456	0.150183			95% confidence interval	0.09886 to 0.5201
									Replicate 18	0.76	0.87552	0.070632			R squared (partial eta squared)	0.3324
									Replicate 19	0.82688	1.11264	0.147335
									Replicate 20	0.7904	0.89376	0.0613718			How effective was the pairing?
									Mean	0.78584	1.09531	0.15426			Correlation coefficient (r)	-0.489
									SEM	0.04608	0.06971	0.05238			P value (one tailed)	0.0143
									Data were analyzed by paired-samples t test P < 0.05						P value summary	*
									Statistical analysis data were shown in right, and statistical analysis were peformed by Grapgpad 8.2.1						Was the pairing significantly effective?	Yes

## Sheet: Figure 2B
Figure 2B
1	Feeding area of H. armigera 5th-instar larvae in two-choice tests: 0.01 mM Sucrose vs Control
	Replicate	Control (cm2)	Sucrose 0.01 mM (cm2)	Preference Index (PI)
	1	0.83904	0.99712	0.0860927
	2	0.9728	0.90592	-0.0355987
	3	0.8512	0.90592	0.0311419
	4	0.912	0.97888	0.0353698
	5	0.912	0.88768	-0.0135135
	6	0.8816	0.912	0.0169492
	7	0.92416	1.07616	0.0759878
	8	0.92416	0.89984	-0.0133333
	9	0.7296	0.72352	-0.0041841
	10	0.8512	0.87552	0.0140845
	11	0.87552	0.17024	-0.674419
	12	0.88768	0.53504	-0.247863
	13	0.37696	0.08512	-0.631579
	14	1.02144	1.11264	0.042735
	15	0.90592	0.9424	0.0197368
	16	0.9424	0.96064	0.00958466
	17	0.90592	0.79648	-0.0642857
	18	0.85728	0.88768	0.0174216
	19	0.91808	0.85728	-0.0342466
	20	0.84512	0.85728	0.00714286
	Mean	0.866704	0.818368	-0.0681388
	SEM	0.02895	0.05939	0.04723
	Data were analyzed by the paired t test, P < 0.05.
2	Feeding area of H. armigera 5th-instar larvae in two-choice tests: 0.1 mM Sucrose vs Control
	Replicate	Control (cm2)	Sucrose 0.1 mM (cm2)	Preference Index (PI)
	1	0.96672	0.6688	-0.182156
	2	0.93632	0.8208	-0.0657439
	3	1.25248	0.95456	-0.134986
	4	0.17024	0.72352	0.619048
	5	1.36192	0.92416	-0.191489
	6	0.8512	0.13376	-0.728395
	7	0.94848	0.87552	-0.04
	8	0.20672	0.8816	0.620112
	9	0.85728	0.8512	-0.00355872
	10	0.84512	0.91808	0.0413793
	11	0.86944	0.91808	0.0272109
	12	1.01536	0.89376	-0.0636943
	13	0.89376	0.9424	0.0264901
	14	0.77824	0.66272	-0.0801688
	15	0.84512	0.89984	0.0313589
	16	0.95456	0.37696	-0.43379
	17	0.912	0.84512	-0.0380623
	18	0.92416	0.8208	-0.0592334
	19	0.4864	1.28896	0.452055
	20	0.912	0.89376	-0.010101
	Mean	0.849376	0.81472	-0.0106863
	SEM	0.06329	0.05212	0.06887
	Data were analyzed by the paired t test, P < 0.05.
3	Feeding area of H. armigera 5th-instar larvae in two-choice tests: 1 mM Sucrose vs Control
	Replicate	Control (cm2)	Sucrose 1 mM (cm2)	Preference Index (PI)
	1	0.96064	1.0336	0.0365854
	2	0.68096	0.9424	0.161049
	3	1.05792	0.96064	-0.0481928
	4	0.81472	0.86944	0.032491
	5	1.16128	0.85728	-0.150602
	6	0.83904	0.84512	0.00361011
	7	0.86336	0.83296	-0.0179211
	8	0.55328	0.88768	0.232068
	9	0.84512	0.87552	0.0176678
	10	0.53504	0.52896	-0.0057143
	11	0.77216	0.83904	0.0415094
	12	0.28576	0.90592	0.520408
	13	0.93632	0.94848	0.00645161
	14	0.9728	0.8816	-0.0491803
	15	0.86944	0.99104	0.0653595
	16	0.80256	0.86336	0.0364963
	17	0.9424	0.912	-0.0163934
	18	0.9424	0.9424	0
	19	1.0032	1.16736	0.0756302
	20	0.89376	0.82688	-0.0388693
	Mean	0.836608	0.895584	0.0451226
	SEM	0.04467	0.02648	0.03058
	Data were analyzed by the paired t test, P < 0.05.
4	Feeding area of H. armigera 5th-instar larvae in two-choice tests: 10 mM Sucrose vs Control
	Replicate	Control (cm2)	Sucrose 10 mM (cm2)	Preference Index (PI)
	1	0.92416	1.368	0.193634
	2	0.92416	1.53824	0.249383
	3	0.93024	0.92416	-0.00327869
	4	0.912	0.8512	-0.0344828
	5	0.9424	0.93632	-0.00323625
	6	0.83904	1.30112	0.215909
	7	0.89984	0.83296	-0.0385965
	8	0.91808	0.89376	-0.0134228
	9	0.8816	1.41056	0.230769
	10	1.29504	0.86944	-0.196629
	11	0.93024	0.8512	-0.0443686
	12	0.7296	0.90592	0.107807
	13	0.86336	1.56864	0.29
	14	0.32832	0.86336	0.44898
	15	0.90592	1.19168	0.136232
	16	0.89376	0.8816	-0.00684932
	17	0.82688	0.87552	0.0285714
	18	0.94848	1.08832	0.0686567
	19	0.15808	0.51072	0.527273
	20	0.93024	1.44096	0.215385
	Mean	0.849072	1.05518	0.118587
	SEM	0.05206	0.06474	0.03999
	Data were analyzed by the paired t test, P < 0.05.
5	Feeding area of H. armigera 5th-instar larvae in two-choice test: 100 mM Sucrose vs Control
	Replicate	Control (cm2)	Sucrose 100 mM (cm2)	Preference Index (PI)
	1	0.83296	1.31328	0.223796
	2	1.03968	0.99712	-0.0208955
	3	0.50464	0.9728	0.316872
	4	0.20064	0.23712	0.0833333
	5	0.93024	1.34976	0.184
	6	0.8512	0.80864	-0.025641
	7	0.89376	0.8816	-0.0068493
	8	0.87552	0.83904	-0.0212766
	9	0.13376	0.81472	0.717949
	10	0.86336	0.86336	0
	11	0.86336	1.31328	0.206704
	12	0.85728	1.51392	0.276923
	13	0.27968	0.90592	0.528205
	14	0.87552	1.5808	0.287129
	15	0.85728	0.85728	0
	16	0.63232	1.368	0.367781
	17	0.86944	0.48032	-0.288288
	18	0.94848	1.45312	0.210127
	19	0.95456	1.5808	0.247002
	20	0.912	1.20384	0.137931
	Mean	0.758784	1.06674	0.17124
	SEM	0.05919	0.08211	0.04988
	Data were analyzed by the paired t test, P < 0.05.

## Sheet: Figure 2C
Figure 2C
	Proboscis extension reflex (PER) in adult females upon antennal stimulation by eight sugars (%)
	Replicate	H2O	Arabinose 100 mM	Fructose 100 mM	Fucose 100 mM	Galactose 100 mM	Glucose 100 mM	Sucrose 100 mM	Trehalose 100mM	Xylose 100 mM
	1	8	6.7	20	56	6.7	12	72	6.67	7
	2	3	0	16.67	36.67	10	10	57	10	3.3
	3	6	10	23.33	40	16.67	6.7	63.3	0	10
	Mean	5.667	5.567	20	44.22	11.12	9.567	64.1	5.557	6.767
	SEM	1.453	2.942	1.923	5.966	2.932	1.545	4.349	2.94	1.938
	Proboscis extension reflex (PER) in adult females upon antennal stimulation by eight sugars (arcsine converted data)
	Replicate	H2O	Arabinose 100 mM	Fructose 100 mM	Fucose 100 mM	Galactose 100 mM	Glucose 100 mM	Sucrose 100 mM	Trehalose 100mM	Xylose 100 mM
	1	16.43	15	26.57	48.45	15	20.27	58.05	14.9746	15.34
	2	9.97	0	24.1	37.27	18.43	18.43	49.02	18.4443	10.47
	3	14.18	18.43	28.88	39.23	24.1	15	52.71	0	18.43
	Data were analyzed by independent-samples t test, P < 0.05.

## Sheet: Figure 2D
Figure 2D
	PER in adult females upon tarsal stimulation by eight sugars (%)
	Replicate	H2O	Arabinose 100 mM	Fructose 100 mM	Fucose 100 mM	Galactose 100 mM	Glucose 100 mM	Sucrose 100 mM	Trehalose 100 mM	Xylose 100 mM
	1	13	3.3	30	36.67	20	10	26	16.67	7
	2	3	0	23.3	50	6.7	13.3	60	6.67	6.7
	3	10	13.3	56.67	50	30.43	13.3	73.3	10	6.67
	Mean	8.667	5.533	36.66	45.56	19.04	12.2	53.1	11.11	6.79
	SEM	2.963	3.998	10.19	4.443	6.867	1.1	14.08	2.94	0.1054
	PER in adult females upon tarsal stimulation by eight sugars (arcsine converted data)
	Replicate	H2O	Arabinose 100 mM	Fructose 100 mM	Fucose 100 mM	Galactose 100 mM	Glucose 100 mM	Sucrose 100 mM	Trehalose 100 mM	Xylose 100 mM
	1	21.13	10.47	33.21	37.27	26.57	18.43	30.66	24.1096	14.18
	2	9.97	0	28.86	45	15	21.39	50.77	14.9746	9.97
	3	18.43	21.39	48.83	45	33.48	21.39	58.89	18.4443	14.97
	Data were analyzed by independent-samples t test, P < 0.05.

## Sheet: Figure 2E
Figure 2E
1	PER in adult females upon antennal stimulation by different concentrations of sucrose (%)
	Replicate	0 mM	0.01 mM	0.1 mM	1 mM	10 mM	100 mM	1000 mM
	1	6	6	3	3	23	47	100
	2	3	16.67	13.33	20	26.67	63.33	83.33
	3	0	0	0	0	7.4	22.22	74.1
	Mean	3	7.557	5.443	7.667	19.02	44.18	85.81
	SEM	1.732	4.875	4.037	6.227	5.907	11.95	7.579
	PER in adult females upon antennal stimulation by different concentrations of sucrose (arcsin converted data)
	Replicate	0 mM	0.01 mM	0.1 mM	1 mM	10 mM	100 mM	1000 mM
	1	14.186	14.186	9.97928	9.97928	28.6727	43.302	90.0456
	2	9.97928	24.1096	21.4248	26.5785	31.1089	52.7578	65.936
	3	0	0	0	0	15.7931	28.1382	59.4382
	Data were analyzed by one-way ANOVA with Tukey's HSD test, P < 0.05.
2	PER in adult females upon antennal stimulation by different concentrations of fucose (%)
	Replicate	0 mM	0.01 mM	0.1 mM	1 mM	10 mM	100 mM	1000 mM
	1	0	11.11	11.11	11.11	7.4	59.26	74.07
	2	11.1	3.7	0	11.1	3.7	40.7	85.2
	3	0	4.17	0	4.17	8.33	70.83	95.83
	Mean	3.7	6.327	3.703	8.793	6.477	56.93	85.03
	SEM	3.7	2.396	3.703	2.312	1.414	8.775	6.282
	PER in adult females upon antennal stimulation by different concentrations of fucose (arcsin converted data)
	Replicate	0 mM	0.01 mM	0.1 mM	1 mM	10 mM	100 mM	1000 mM
	1	0	19.4801	19.4801	19.4801	15.7931	50.3619	59.4186
	2	19.471	11.0958	0	19.471	11.0958	39.6604	67.4086
	3	0	11.789	0	11.789	16.7837	57.3391	78.2567
	Data were analyzed by one-way ANOVA with Tukey's HSD test, P < 0.05
3	PER in adult females upon antennal stimulation by different concentrations of fructose (%)
	Replicate	0 mM	0.01 mM	0.1 mM	1 mM	10 mM	100 mM	1000 mM
	1	18.5	7.4	7.4	7.4	7.4	7.4	92.59
	2	3.7	0	0	0	0	42	59.2
	3	0	0	0	0	0	22	69.23
	Mean	7.4	2.467	2.467	2.467	2.467	23.8	73.67
	SEM	5.652	2.467	2.467	2.467	2.467	10.03	9.892
	PER in adult females upon antennal stimulation by different concentrations of fructose (arcsin converted data)
	Replicate	0 mM	0.01 mM	0.1 mM	1 mM	10 mM	100 mM	1000 mM
	1	25.4879	15.7931	15.7931	15.7931	15.7931	15.7931	74.2416
	2	11.0958	0	0	0	0	40.417	50.3269
	3	0	0	0	0	0	27.9863	56.338
	Data were analyzed by one-way ANOVA with Tukey's HSD test, P < 0.05

## Sheet: Figure 2F
Figure 2F
1	PER in adult females upon tarsal stimulation by different concentrations of sucrose (%)
	Replicate	0 mM	0.01 mM	0.1 mM	1 mM	10 mM	100 mM	1000 mM
	1	0.03	0	6	6	23	63	87
	2	6.7	3.3	6.67	10	23.33	66.67	90
	3	0	3.7	0	14.8	44.4	22.2	77.7
	Mean	2.243	2.333	4.223	10.27	30.24	50.62	84.9
	SEM	2.228	1.172	2.121	2.544	7.079	14.25	3.703
	PER in adult females upon tarsal stimulation by different concentrations of sucrose (arcsin converted data)
	Replicate	0 mM	0.01 mM	0.1 mM	1 mM	10 mM	100 mM	1000 mM
	1	0.992945	0	14.186	14.186	28.6727	52.5617	68.9006
	2	15.0091	10.4717	14.9746	18.4443	28.8969	54.7654	71.6014
	3	0	11.0958	0	22.6371	41.8059	28.1244	61.8523
	Data were analyzed by one-way ANOVA with Tukey's HSD test, P < 0.05.
2	PER in adult females upon tarsal stimulation by different concentrations of fucose (%)
	Replicate	0 mM	0.01 mM	0.1 mM	1 mM	10 mM	100 mM	1000 mM
	1	3.7	11.11	3.7	7.4	25.92	62.96	83
	2	0	0	0	6.7	22.2	70.3	96.2
	3	0	0	0	3.3	16.7	83.33	90
	Mean	1.233	3.703	1.233	5.8	21.61	72.2	89.73
	SEM	1.233	3.703	1.233	1.266	2.678	5.956	3.813
	PER in adult females upon tarsal stimulation by different concentrations of fucose (arcsin converted data)
	Replicate	0 mM	0.01 mM	0.1 mM	1 mM	10 mM	100 mM	1000 mM
	1	11.0958	19.4801	11.0958	15.7931	30.6205	52.5379	65.6832
	2	0	0	0	15.0091	28.1244	57.0058	78.799
	3	0	0	0	10.4717	24.1327	65.936	71.6014
	Data were analyzed by one-way ANOVA with Tukey's HSD test, P < 0.05
3	PER in adult females upon tarsal stimulation by different concentrations of fructose (%)
	Replicate	0 mM	0.01 mM	0.1 mM	1 mM	10 mM	100 mM	1000 mM
	1	0	3.3	7.4	3.7	0	55.56	96.3
	2	3.7	7.6	0	0	3.7	23	80.7
	3	0	7.7	3.3	0	3.85	30.77	80.77
	Mean	1.233	6.2	3.567	1.233	2.517	36.44	85.92
	SEM	1.233	1.45	2.14	1.233	1.259	9.818	5.188
	PER in adult females upon tarsal stimulation by different concentrations of fructose (arcsin converted data)
	Replicate	0 mM	0.01 mM	0.1 mM	1 mM	10 mM	100 mM	1000 mM
	1	0	10.4717	15.7931	11.0958	0	48.2167	78.9498
	2	11.0958	16.0107	0	0	11.0958	28.6727	63.9721
	3	0	16.1186	10.4717	0	11.3214	33.7076	64.023
	Data were analyzed by one-way ANOVA with Tukey's HSD test, P < 0.05
