# Supplementary material for: The larva and adult of Helicoverpa armigera use differential gustatory receptors to sense sucrose
Source: eLife. 2024 May 30;12:RP91711. doi: 10.7554/eLife.91711 (PMC11139476; doi:10.7554/eLife.91711)
Supplement: Figure 3—figure supplement 1—source data 1. — (Figure 3—figure supplement 1A) Expression levels of sugar GRs in the antennae of H. armigera male adults. (Figure 3—figure supplement 1B) Expression levels of sugar GRs in the tarsi of H. armigera male adults. (Figure 3—figure supplement 1C) Expression levels of sugar GRs in the proboscis of H. armigera male adults. [file elife-91711-fig3-figsupp1-data1.xlsx]

## Sheet: Figure 3-Figure Supplement 1A
Figure 3-Figure Supplement 1A
	Expression levels of sugar GRs in the antennae of H. armigera male adults
	Replicate	Gr4	Gr5	Gr6	Gr7	Gr8	Gr9	Gr10	Gr11	Gr12
	1	0.00241902	0.00012709	0.0173132	0.00410376	0.00289133	0.0011992	9.3076e-05	0.00395339	0.00058397
	2	0.0032555	0.00013221	0.0113303	0.00571956	0.00514628	0.00165289	4.2221e-05	0.0015219	0.00064638
	3	0.0143102	0.00048052	0.0513325	0.0157572	0.0243155	0.00737232	5.1339e-05	0.00499451	0.0059188
	Data were analyzed by one-way ANOVA with Tukey's HSD test, P < 0.05.

## Sheet: Figure 3-Figure Supplement 1B
Figure 3-Figure Supplement 1B
	Expression levels of sugar GRs in the tarsi of H. armigera male adults
	Replicate	Gr4	Gr5	Gr6	Gr7	Gr8	Gr9	Gr10	Gr11	Gr12
	1	0.00419615	0.0125845	0.0192576	0.00787073	0.00414263	0.00384939	6.7418e-05	0.00711696	0.00224649
	2	0.00511471	0.0139969	0.0138222	0.00921801	0.00565481	0.00323173	4.6127e-05	0.00351923	0.00145297
	3	0.00681336	0.0136289	0.0179208	0.00703169	0.00370913	0.0028686	0.00015908	0.0016203	0.0015394
	Data were analyzed by one-way ANOVA with Tukey's HSD test, P < 0.05.

## Sheet: Figure 3-Figure Supplement 1C
Figure 3-Figure Supplement 1C
	Expression levels of sugar GRs in the proboscis of H. armigera male adults
	Replicate	Gr4	Gr5	Gr6	Gr7	Gr8	Gr9	Gr10	Gr11	Gr12
	1	0.00065006	0.0176539	0.0119736	0.00210869	0.00407858	0.0006579	0.00251453	0.00402457	0.00092916
	2	0.00186101	0.0429302	0.0168045	0.00507028	0.0108741	0.00109792	0.00431157	0.00270866	0.00106961
	3	0.00399882	0.0813061	0.0372527	0.00752499	0.0236299	0.00150432	0.00527027	0.00105931	0.00101193
	Data were analyzed by one-way ANOVA with Tukey's HSD test, P < 0.05.
