# Supplementary material for: The larva and adult of Helicoverpa armigera use differential gustatory receptors to sense sucrose
Source: eLife. 2024 May 30;12:RP91711. doi: 10.7554/eLife.91711 (PMC11139476; doi:10.7554/eLife.91711)
Supplement: Figure 3—source data 1. — (Figure 3B) Expression levels of sugar GRs in the maxillary galea of H. armigera larvae. (Figure 3C) Expression levels of sugar GRs in the antennae of H. armigera female adults. (Figure 3D) Expression levels of sugar GRs in the tarsi of H. armigera female adults. (Figure 3E) Expression levels of sugar GRs in the proboscis of H. armigera female adults. [file elife-91711-fig3-data1.xlsx]

## Sheet: Figure 3B
Figure 3B
	Expression levels of sugar GRs in the maxillary galea of H. armigera larvae
	Replicate	Gr4	Gr5	Gr6	Gr7	Gr8	Gr9	Gr10	Gr11	Gr12
	1	0.00122734	9.1537e-05	0.00140218	0.00011718	3.3434e-05	0.00028521	0.00924063	0.00317953	0.00031921
	2	0.00237049	0.00020801	0.00260438	0.00014374	2.2735e-05	0.00082843	0.0126402	0.00169911	0.00084922
	3	0.00211699	0.00010494	0.00220933	0.00014167	3.6556e-05	0.00036178	0.00882061	0.00052494	0.00045043
	Data were analyzed by one-way ANOVA with Tukey's HSD test, P < 0.05.

## Sheet: Figure 3C
Figure 3C
	Expression levels of sugar GRs in the antennae of H. armigera female adults
	Replicate	Gr4	Gr5	Gr6	Gr7	Gr8	Gr9	Gr10	Gr11	Gr12
	1	0.003861	0.000552	0.027149	0.004192	0.004115	0.001617	6.71e-05	0.008899	0.000784
	2	0.008683	0.000226	0.025908	0.00815	0.008354	0.002351	5.07e-05	0.005726	0.000729
	3	0.004684	6.17e-05	0.013049	0.005818	0.004803	0.002817	2.13e-05	0.002529	0.001555
	Data were analyzed by one-way ANOVA with Tukey's HSD test, P < 0.05.

## Sheet: Figure 3D
Figure 3D
	Expression levels of sugar GRs in the tarsi of H. armigera female adults
	Replicate	Gr4	Gr5	Gr6	Gr7	Gr8	Gr9	Gr10	Gr11	Gr12
	1	0.00369249	0.00799953	0.011748	0.00494316	0.00191775	0.00217347	8.964e-05	0.00373819	0.00094815
	2	0.00561223	0.0117367	0.0146804	0.00828867	0.00453472	0.00279819	0.00010851	0.00467597	0.00110288
	3	0.00464691	0.00732035	0.00687736	0.00339387	0.00233069	0.00355447	6.6826e-05	0.00307129	0.00162119
	Data were analyzed by one-way ANOVA with Tukey's HSD test, P < 0.05.

## Sheet: Figure 3E
Figure 3E
	Expression levels of sugar GRs in the proboscis of H. armigera female adults
	Replicate	Gr4	Gr5	Gr6	Gr7	Gr8	Gr9	Gr10	Gr11	Gr12
	1	0.00044	0.013369	0.008718	0.000966	0.002652	0.000481	0.001224	0.005063	0.000499
	2	0.002625	0.062326	0.026417	0.00485	0.012516	0.002143	0.005975	0.008569	0.001897
	3	0.000811	0.022552	0.010908	0.002348	0.005405	0.001375	0.001857	0.001486	0.001023
	Data were analyzed by one-way ANOVA with Tukey's HSD test, P < 0.05.
