# Supplementary material for: The larva and adult of Helicoverpa armigera use differential gustatory receptors to sense sucrose
Source: eLife. 2024 May 30;12:RP91711. doi: 10.7554/eLife.91711 (PMC11139476; doi:10.7554/eLife.91711)
Supplement: Figure 4—figure supplement 1—source data 1. — (Figure 4—figure supplement 1A) The inward current responses of the oocytes expressing sugar GRs to 100 mM sugars. (Figure 4—figure supplement 1C) The inward current responses of the oocytes expressing Gr5 +Gr6 to 100 mM sugars. [file elife-91711-fig4-figsupp1-data1.xlsx]

## Sheet: Figure 4-Figure Supplement 1A
Figure 4-Figure Supplement 1A
1	The inward current responses of the oocytes injecting H2O to 100 mM sugar compounds (mA)
	Replicate	Arabinose	Fructose	Fucose	Galactose	Glucose	Mannose	Xylose	Lactose	Maltose	Sucrose	Trehalose	Ringer solution
	1	0	0	0	0	0	0	0	0	0	0	0	0
	2	0	0	0	0	0	0	0	0	0	0	0	0
	3	0	0	0	0	0	0	0	0	0	0	0	0
	4	0	0	0	0	0	0	0	0	0	0	0	0
	5	0	0	0	0	0	0	0	0	0	0	0	0
	6	0	0	0	0	0		0	0	0	0	0	0
2	The inward current responses of the oocytes expressing Gr4 to 100 mM sugar compounds (mA)
	Replicate	Arabinose	Fructose	Fucose	Galactose	Glucose	Mannose	Xylose	Lactose	Maltose	Sucrose	Trehalose	Ringer solution
	1	0	0	0	0	0	0	0	0	0	0	0	0
	2	0	0	0	0	0	0	0	0	0	0	0	0
	3	0	0	0	0	0	0	0	0	0	0	0	0
	4		0	0	0	0	0	0	0	0	0	0	0
	5		0	0	0	0	0	0	0	0	0	0	0
	6		0	0	0	0	0	0	0	0	0	0	0
	7		0	0	0	0	0	0	0	0	0	0	0
3	The inward current responses of the oocytes expressing Gr5 to 100 mM sugar compounds (mA)
	Replicate	Arabinose	Fructose	Fucose	Galactose	Glucose	Mannose	Xylose	Lactose	Maltose	Sucrose	Trehalose	Ringer solution
	1	0	0	0	0	0	0	0	0	0	0	0	0
	2	0	0	0	0	0	0	0	0	0	0	0	0
	3	0	0	0	0	0	0	0	0	0	0	0	0
	4	0	0	0	0	0	0	0	0	0	0	0	0
	5	0	0	0	0	0	0	0	0	0	0	0	0
	6	0	0	0	0	0	0	0	0	0	0	0	0
	7	0	0	0	0	0	0	0	0	0	0	0	0
4	The inward current responses of oocyte expressing Gr6 to 100 mM sugar compounds (mA)
	Replicate	Arabinose	Fructose	Fucose	Galactose	Glucose	Mannose	Xylose	Lactose	Maltose	Sucrose	Trehalose	Ringer solution
	1	0	0	1.3354	0	0	0	0	0	0	0.2478	0	0
	2	0	0.0293	1.6855	0	0	0	0	0	0	0.1959	0	0
	3	0	0.0363	1.5775	0	0	0	0	0	0	0.368	0	0
	4	0	0.0275	1.5405	0	0	0	0	0	0	0.3619	0	0
	5	0	0.0342	1.3669	0	0	0	0	0	0	0.7166	0	0
	6	0	0.0388	1.842	0	0	0	0	0	0	0.1016	0	0
	7	0	0	1.3712	0	0	0	0	0	0	0.1132	0	0
	8	0	0.0412	2.0657	0	0	0	0	0	0	0.108	0	0
	9	0	0.036	1.7874	0	0	0	0	0	0	0.1303	0	0
	10	0	0.0305	1.6229	0	0	0	0	0	0	0.2325	0	0
	11	0	0.0186	1.4813	0	0	0	0	0	0	0.2408	0	0
	12	0	0.0116	1.9427	0	0	0	0	0	0	0.1511	0	0
	13	0	0	1.7232	0	0	0	0	0	0	0.1166	0	0
	14	0	0.0195	1.9531	0	0	0	0	0	0	0.2887	0	0
	15	0	0.0357	1.9684	0	0	0	0	0	0	0.2451	0	0
	16	0	0.0406	0.6842	0	0		0	0	0	0.4071	0	0
	17	0	0.0592	2.0972	0	0		0	0	0	0.2158	0	0
	18	0	0.0632	1.7468	0	0		0	0	0	0.209	0	0
	19	0	0.036	1.058	0	0		0	0	0	0.1193	0	0
	20	0	0.0476	1.0959	0	0		0	0	0	0.2225	0	0
5	The inward current responses of the oocytes expressing Gr7 to 100 mM sugar compounds (mA)
	Replicate	Arabinose	Fructose	Fucose	Galactose	Glucose	Mannose	Xylose	Lactose	Maltose	Sucrose	Trehalose	Ringer solution
	1	0	0	0	0	0	0	0	0	0	0	0	0
	2	0	0	0	0	0	0	0	0	0	0	0	0
	3	0	0	0	0	0	0	0	0	0	0	0	0
	4	0	0	0	0	0	0	0	0	0	0	0	0
	5	0	0	0	0	0	0	0	0	0	0	0	0
6	The inward current responses of the oocytes expressing Gr8 to 100 mM sugar compounds (mA)
	Replicate	Arabinose	Fructose	Fucose	Galactose	Glucose	Mannose	Xylose	Lactose	Maltose	Sucrose	Trehalose	Ringer solution
	1	0	0	0	0	0	0	0	0	0	0	0	0
	2	0	0	0	0	0	0	0	0	0	0	0	0
	3	0	0	0	0	0	0	0	0	0	0	0	0
	4	0	0	0	0	0	0	0	0	0	0	0	0
	5	0	0	0	0	0	0	0	0	0	0	0	0
7	The inward current responses of the oocyte expressing Gr10 to 100 mM sugar compounds (mA)
	Replicate	Arabinose	Fructose	Fucose	Galactose	Glucose	Mannose	Xylose	Lactose	Maltose	Sucrose	Trehalose	Ringer solution
	1	0	0	0	0	0	0	0	0	0	3.4698	0	0
	2	0	0	0	0	0	0	0	0	0	2.7652	0	0
	3	0	0	0	0	0	0	0	0	0	5.8572	0	0
	4	0	0	0	0	0	0	0	0	0	3.8647	0	0
	5	0	0	0	0	0	0	0	0	0	4.9951	0	0
	6	0	0	0	0	0	0	0	0	0	4.9332	0	0
	7	0.0275	0	0	0	0	0	0	0	0	8.1216	0	0
	8	0	0	0	0	0	0	0	0	0.0146	2.2314	0	0
	9	0.0186	0	0	0	0	0	0	0	0	2.4155	0	0
	10	0.0183	0	0	0	0	0	0	0	0.0162	2.8369	0	0
	11	0.0259	0	0.0143	0	0	0	0	0	0.0159	3.6703	0	0
	12	0.0162	0	0.0168	0	0	0	0	0	0.0256	7.5839	0	0
	13	0.0232	0	0	0	0	0	0	0	0	3.4213	0	0
	14	0	0	0.011	0	0	0	0	0		1.1826	0	0
8	The inward current responses of the oocytes expressing Gr11 to 100 mM sugar compounds (mA)
	Replicate	Arabinose	Fructose	Fucose	Galactose	Glucose	Mannose	Xylose	Lactose	Maltose	Sucrose	Trehalose	Ringer solution
	1	0	0	0	0	0	0	0	0	0	0	0	0
	2	0	0	0	0	0	0	0	0	0	0	0	0
	3	0	0	0	0	0	0	0	0	0	0	0	0
	4	0	0	0	0	0	0	0	0	0	0	0	0
	5	0	0	0	0	0	0	0	0	0	0	0	0
	6	0	0	0	0	0	0	0	0	0	0	0	0
9	The inward current responses of the oocytes expressing Gr12 to 100 mM sugar compounds (mA)
	Replicate	Arabinose	Fructose	Fucose	Galactose	Glucose	Mannose	Xylose	Lactose	Maltose	Sucrose	Trehalose	Ringer solution
	1	0	0	0	0	0	0	0	0	0	0	0	0
	2	0	0	0	0	0	0	0	0	0	0	0	0
	3	0	0	0	0	0	0	0	0	0	0	0	0
	4	0	0	0	0	0	0	0	0	0	0	0	0
	5	0	0	0	0	0	0	0	0	0	0	0	0
	6	0	0	0	0	0	0	0	0	0	0	0	0
10	The inward current responses of the oocytes expressing Gr10 + Gr6 to 100 mM sugar compounds (mA)
	Replicate	Arabinose	Fructose	Fucose	Galactose	Glucose	Mannose	Xylose	Lactose	Maltose	Sucrose	Trehalose	Ringer solution
	1	0	0	0.098	0	0	0	0	0	0	1.0321	0	0
	2	0	0	0.0586	0	0	0	0	0	0	2.7603	0	0
	3	0	0	0.0491	0	0	0	0	0	0	3.8025	0	0
	4	0	0	0.0693	0	0	0	0	0	0	1.7862	0	0
	5	0	0	0	0	0	0	0	0	0	0.1929	0	0
	6	0	0	0.1544	0	0	0	0	0	0	3.584	0	0
	7	0	0	0.1056	0	0	0	0	0	0.0137	0.1334	0	0

## Sheet:  Figure 4-Figure Supplement 1C
Figure 4-Figure Supplement 1C
	The inward current responses of the oocytes expressing Gr5 + Gr6 to 100 mM sugar compounds (mA)
	Replicate	Arabinose	Fructose	Fucose	Galactose	Glucose	Mannose	Xylose	Lactose	Maltose	Sucrose	Trehalose	Ringer solution
	1	0	0	0.1233	0	0	0	0	0	0	0.0266	0	0
	2	0	0	0.1627	0	0	0	0	0	0	0.0311	0	0
	3	0	0	0.1492	0	0	0	0	0	0	0.0348	0	0
	4	0	0	0.0851	0	0	0	0	0	0	0.0317	0	0
	5	0	0	0.08	0	0	0	0	0	0	0.029	0	0
	6	0	0	0.134	0	0	0	0	0	0	0.0204	0	0
	7	0	0	0.1056	0	0	0	0	0	0	0.0082	0	0
	8	0	0	0.2014	0	0	0	0	0	0	0.0296	0	0
	9	0	0	0.049	0	0	0	0	0	0	0.0275	0	0
	10	0	0	0.0742	0	0	0	0	0	0	0.0247	0	0
	Mean	0	0	0.1165	0	0	0	0	0	0	0.02636	0	0
	SEM	0	0	0.01474	0	0	0	0	0	0	0.002378	0	0
	Data were analyzed by one-way ANOVA with Tukey's HSD test, P < 0.05.
