# Supplementary material for: The larva and adult of Helicoverpa armigera use differential gustatory receptors to sense sucrose
Source: eLife. 2024 May 30;12:RP91711. doi: 10.7554/eLife.91711 (PMC11139476; doi:10.7554/eLife.91711)
Supplement: Figure 4—source data 1. — (Figure 4B) The inward current responses of the oocyte expressing Gr10, Gr6 and Gr10 +Gr6 to 100 mM sugars. (Figure 4D) The inward current responses of the oocyte expressing Gr10, Gr6 and Gr10 +Gr6 to sucrose, fucose, and fructose at different concentrations. [file elife-91711-fig4-data1.xlsx]

## Sheet: Figure 4B
Figure 4B
1	The inward current responses of the oocyte expressing Gr10 to 100 mM sugar compounds (mA)
	Replicate	Fructose	Fucose	Sucrose	Ringer solution
	1	0	0	3.4698	0
	2	0	0	2.7652	0
	3	0	0	5.8572	0
	4	0	0	3.8647	0
	5	0	0	4.9951	0
	6	0	0	4.9332	0
	7	0	0	8.1216	0
	8	0	0	2.2314	0
	9	0	0	2.4155	0
	10	0	0	2.8369	0
	11	0	0.0143	3.6703	0
	12	0	0.0168	7.5839	0
	13	0	0	3.4213	0
	14	0	0.011	1.1826	0
	Mean	0	0.003007	4.096	0
	SEM	0	0.001626	0.5356	0
	Data were analyzed by one-way ANOVA with Tukey's HSD test, P < 0.05.
2	The inward current responses of oocyte expressing Gr6 to 100 mM sugar compounds (mA)
	Replicate	Fructose	Fucose	Sucrose	Ringer solution
	1	0	1.3354	0.2478	0
	2	0.0293	1.6855	0.1959	0
	3	0.0363	1.5775	0.368	0
	4	0.0275	1.5405	0.3619	0
	5	0.0342	1.3669	0.7166	0
	6	0.0388	1.842	0.1016	0
	7	0	1.3712	0.1132	0
	8	0.0412	2.0657	0.108	0
	9	0.036	1.7874	0.1303	0
	10	0.0305	1.6229	0.2325	0
	11	0.0186	1.4813	0.2408	0
	12	0.0116	1.9427	0.1511	0
	13	0	1.7232	0.1166	0
	14	0.0195	1.9531	0.2887	0
	15	0.0357	1.9684	0.2451	0
	16	0.0406	0.6842	0.4071	0
	17	0.0592	2.0972	0.2158	0
	18	0.0632	1.7468	0.209	0
	19	0.036	1.058	0.1193	0
	20	0.0476	1.0959	0.2225	0
	Mean	0.03029	1.597	0.2396	0
	SEM	0.003982	0.0821	0.03224	0
	Data were analyzed by one-way ANOVA with Tukey's HSD test, P < 0.05.
3	The inward current responses of the oocyte expressing Gr10 + Gr6 to 100 mM sugar compounds (mA)
	Replicate	Fructose	Fucose	Sucrose	Ringer solution
	1	0	0.098	1.0321	0
	2	0	0.0586	2.7603	0
	3	0	0.0491	3.8025	0
	4	0	0.0693	1.7862	0
	5	0	0	0.1929	0
	6	0	0.1544	3.584	0
	7	0	0.1056	0.1334	0
	Mean	0	0.07643	1.899	0
	SEM	0	0.01849	0.5773	0
	Data were analyzed by one-way ANOVA with Tukey's HSD test, P < 0.05.

## Sheet: Figure 4D
Figure 4D
1	The inward current responses of oocyte expressing Gr10 to sucrose (mA)
	Replicate	Sucrose 0.01 mM	Sucrose 0.1 mM	Sucrose 1 mM	Sucrose 10 mM	Sucrose 100 mM	Sucrose 250 mM	Sucrose 500 mM
	1	0	0	0.0302	0.7004	7.5662	9.1998	7.1548
	2	0	0	0	0.098	1.9299	2.8363	2.97
	3	0	0	0	0.3381	4.5862	7.5961	7.4213
	4	0	0	0	0.3619	4.9716	5.7999	5.8301
	5	0	0	0.0244	0.7748	7.3499	8.822	8.9932
	6	0	0	0	0.051	1.0049	1.5421	1.6873
	7	0	0	0.011	0.4681	5.3024	6.7288	7.7823
	8	0	0	0.0192	0.5368	5.7104	6.8646	6.8835
	9	0	0	0	0.0909	1.6275	2.2043	2.2241
	10	0	0	0	0.0696	1.3736	1.9171	1.9827
	11	0	0	0	0.1193	2.4438	3.1314	2.3029
	12	0	0	0.6519	0.824	3.4857	4.259	5.3516
	13	0	0	0	0.0238	0.5255	0.8939	0.9921
	Mean	0	0	0.05667	0.3428	3.683	4.753	4.737
	SEM	0	0	0.04969	0.08144	0.6655	0.8013	0.7717
	Data were analyzed by one-way ANOVA with Tukey's HSD test, P < 0.05.
2	The inward current responses of oocyte expressing Gr6 to sucrose (mA)
	Replicate	Sucrose 0.1 mM	Sucrose 1 mM	Sucrose 10 mM	Sucrose 50 mM	Sucrose 100 mM	Sucrose 250 mM	Sucrose 500 mM
	1	0	0	0	0.0128	0.0745	0.6671	2.5052
	2	0	0	0	0.04	0.2496	2.0486	6.9928
	3	0	0	0	0.0433	0.383	2.4866	7.5998
	4	0	0	0.0159	0.0726	0.5344	3.1754	7.8949
	5	0	0	0	0.0616	0.5969	2.9919	8.0685
	6	0	0	0.0119	0.0565	0.4669	3.3514	8.4207
	7	0	0	0.0064	0.0558	0.4538	2.6624	7.3981
	8	0	0	0	0.0681	0.3806	2.1735	5.6226
	Mean	0	0	0.004275	0.05134	0.3925	2.445	6.813
	SEM	0	0	0.002272	0.006766	0.0587	0.3016	0.6853
	Data were analyzed by one-way ANOVA with Tukey's HSD test, P < 0.05
3	The inward current responses of oocyte expressing Gr6 to fucose (mA)
	Replicate	Fucose 0.1 mM	Fucose 1 mM	Fucose 10 mM	Fucose 50 mM	Fucose 100 mM	Fucose 250 mM	Fucose 500 mM
	1	0	0	0.015	0.5106	2.1432	7.699	9.9387
	2	0	0	0.0211	0.567	2.2696	7.3126	9.8593
	3	0	0	0.0095	0.585	1.9269	6.4706	10
	4	0	0	0.0223	0.6039	2.5357	9.3466	10
	5	0	0	0.0131	0.4544	1.8417	6.3132	9.2599
	6	0	0	0.0098	0.4721	1.6287	4.6109	7.0816
	Mean	0	0	0.01513	0.5322	2.058	6.959	9.357
	SEM	0	0	0.002246	0.02535	0.1327	0.6466	0.4692
	Data were analyzed by one-way ANOVA with Tukey's HSD test, P < 0.05
4	The inward current responses of oocyte expressing Gr6 to fructose (mA)
	Replicates	Fructose 0.1 mM	Fructose 1 mM	Fructose 10 mM	Fructose 50 mM	Fructose 100 mM	Fructose 250 mM	Fructose 500 mM
	1	0	0	0	0.0189	0.0793	0.3796	1.7447
	2	0	0	0	0	0.0391	0.1898	0.7617
	3	0	0	0	0.0323	0.0916	0.4355	1.7123
	Mean	0	0	0	0.01707	0.07	0.335	1.406
	SEM	0	0	0	0.009369	0.01585	0.07436	0.3224
	Data were analyzed by one-way ANOVA with Tukey's HSD test, P < 0.05
5	The inward current responses of oocyte expressing Gr10 + Gr6 to sucrose (mA)
	Replicate	0.01 mM	0.1 mM	1 mM	10 mM	100 mM	250 mM	500 mM
	1	0	0	0.0229	0.3098	4.3521	6.0049	7.0514
	2	0	0	0.0076	0.3003	4.2847	6.6058	7.514
	3	0	0	0.0131	0.1056	2.8265	4.3787	4.8022
	4	0	0	0.0418	0.0992	2.8427	4.3875	4.5297
	Mean	0	0	0.02135	0.2037	3.577	5.344	5.974
	SEM	0	0	0.007515	0.05855	0.4286	0.5683	0.7633
	Data were analyzed by one-way ANOVA with Tukey's HSD test, P < 0.05
6	The inward current responses of oocyte expressing Gr10 + Gr6 to fucose (mA)
	Replicate	0.01 mM	0.1 mM	1 mM	10 mM	100 mM	250 mM	500 mM
	1	0	0	0	0.0098	0.0916	0.4413	1.0153
	2	0	0	0	0	0.1263	0.5728	1.6068
	3	0	0	0	0	0.1202	0.6439	1.2091
	Mean	0	0	0	0.003267	0.1127	0.5527	1.277
	SEM	0	0	0	0.003267	0.1127	0.5527	1.277
	Data were analyzed by one-way ANOVA with Tukey's HSD test, P < 0.05
