# Supplementary material for: The larva and adult of Helicoverpa armigera use differential gustatory receptors to sense sucrose
Source: eLife. 2024 May 30;12:RP91711. doi: 10.7554/eLife.91711 (PMC11139476; doi:10.7554/eLife.91711)
Supplement: Figure 5—figure supplement 2—source data 1. — (Figure 5—figure supplement 2B) The electrophysiological responses of the medial sensilla styloconica of larvae in the wild type (WT) and two mutants of H. armigera to KCl and xylose. (Figure 5—figure supplement 2C) The larval body weight, adult lifespan, and the number of eggs laid by females of the WT and two mutants of H. armigera. [file elife-91711-fig5-figsupp2-data1.xlsx]

## Sheet: Figure 5-Figure Supplement 2B
Figure 5-Figure Supplement 2B
1	The electrophysiological responses of the medial sensilla styloconica of larvae in the wild type (WT) and two mutants of H. armigera to 2 mM KCl (spikes/s)
	Replicate	WT	Gr10-/-	Gr6-/-
	1	0	0	0
	2	0	4	0
	3	2	0	0
	4	9	0	0
	5	0	0	0
	6	0	0	0
	7	0	2	0
	8	4	0	0
	Mean	1.875	0.75	0
	SEM	1.141	0.5261	0
	Data were analyzed by one-way ANOVA with Tukey's HSD test, P < 0.05.
2	The electrophysiological responses of the medial sensilla styloconica of larvae in the wild type (WT) and two mutants of H. armigera to 10 mM xylose (spikes/s)
	Replicate	WT	Gr10-/-	Gr6-/-
	1	96	87	54
	2	44	50	36
	3	48	67	37
	4	108	24	46
	5	55	101	74
	6	39	92	115
	7	79	67	54
	8	50	26	72
	Mean	64.88	64.25	61
	SEM	9.197	10.3	9.19
	Data were analyzed by one-way ANOVA with Tukey's HSD test, P < 0.05.

## Sheet: Figure 5-Figure Supplement 2C
Figure 5-Figure Supplement 2C
1	The larval body weight of the wild type (WT) and two mutants of H. armigera
	Replicate	WT	Gr10-/-	Gr6-/-
	1	0.1152	0.1074	0.1183
	2	0.1897	0.1109	0.0992
	3	0.144	0.1377	0.1197
	4	0.153	0.112	0.1897
	5	0.1847	0.1353	0.144
	6	0.1248	0.1259	0.153
	7	0.1955	0.1004	0.1847
	8	0.1599	0.1081	0.1248
	9	0.1342	0.1667	0.1955
	10	0.1211	0.1926	0.1599
	11	0.1004	0.1928	0.1342
	12	0.1365	0.1776	0.1211
	13	0.1695	0.1977	0.1004
	14	0.1609	0.121	0.1365
	15	0.1391	0.1208	0.1695
	16	0.1495	0.1033	0.1609
	Mean	0.1486	0.1381	0.1445
	SEM	0.006817	0.008789	0.007601
	Data were analyzed by one-way ANOVA with Tukey's HSD test, P < 0.05.
2	The adult lifespan of the wild type (WT) and two mutants of H. armigera
	Replicate	WT	Gr10-/-	Gr6-/-
	1	12	21	28
	2	11	19	5
	3	13	16	24
	4	13	15	27
	5	14	15	27
	6	15	15	28
	7	16	17	21
	8	14	15	9
	9	19	16	21
	10	16	15	15
	11	22	17	16
	12	25	19	23
	13	27	16	24
	14	9	19	19
	15	25	19	13
	16	25	16	17
	Mean	17.25	16.88	19.81
	SEM	1.445	0.482	1.725
	Data were analyzed by one-way ANOVA with Tukey's HSD test, P < 0.05.
3	The number of eggs laid by females of the wild type (WT) and two mutants of H. armigera
	Replicate	WT	Gr10-/-	Gr6-/-
	1	440	539	667
	2	525	260	215
	3	401	434	428
	4	285	361	410
	5	562	498	568
	Mean	442.6	418.4	457.6
	SEM	48.8	49.75	76.82
	Data were analyzed by one-way ANOVA with Tukey's HSD test, P < 0.05.
