# Supplementary material for: The larva and adult of Helicoverpa armigera use differential gustatory receptors to sense sucrose
Source: eLife. 2024 May 30;12:RP91711. doi: 10.7554/eLife.91711 (PMC11139476; doi:10.7554/eLife.91711)
Supplement: Figure 6—source data 1. — (Figure 6B) The electrophysiological responses of the lateral sensilla styloconica on the maxillary galea of larvae in the WT and two mutants of H. armigera to test compounds. (Figure 6D) The electrophysiological responses of the contact chemosensilla on the antennae of female adults in the WT and two mutants of H. armigera to test compounds. (Figure 6F) The electrophysiological responses of the contact chemosensilla on the fore leg tarsi of female adults in the WT and two mutants of H. armigera to test compounds. (Figure 6H) The electrophysiological responses of the contact chemosensilla on the proboscis of female adults in the WT and two mutants of H. armigera to test compounds. [file elife-91711-fig6-data1.xlsx]

## Sheet: Figure 6B
Figure 6B
1	The electrophysiological responses of the lateral sensilla styloconica on the maxillary galea of larvae in the wild type (WT) and two mutants of H. armigera to 2 mM KCl (spikes/s)
	Replicates	WT	Gr10-/-	Gr6-/-
	1	0	0	0
	2	0	0	0
	3	10	0	4
	4	1	0	14
	5	0	0	0
	6	0	35	0
	7	0	0	0
	8	0	0	12
	9	0	5	9
	10	2	5	15.5
	11	26	5	0
	12	0	4.5	6
	13		2	4
	Data were analyzed by one-way ANOVA with Tukey's HSD test, P < 0.05
2	The electrophysiological responses of the lateral sensilla styloconica of larvae on the maxillary galea of larvae in the wild type (WT) and two mutants of H. armigera to sucrose (spikes/s)
	Replicate	WT			Gr10-/-			Gr6-/-
		Sucrose 1 mM	Sucrose 10 mM	Sucrose 100 mM	Sucrose 1 mM	Sucrose 10 mM	Sucrose 100 mM	Sucrose 1 mM	Sucrose 10 mM	Sucrose 100 mM
	1	173	135.5	151	39.5	24	63	65.5	107	113
	2	45	121	134	60	77.5	82.5	68	108.5	124.5
	3	87	160	153	47	0	31	91	116	112.5
	4	145	133.5	156	0	0	0	152	125	127
	5	77.5	121	151	24.5	17	20	123	152.5	164
	6	127.5	157.5	152	81	19	13.5	88.5	131.5	148.5
	7	148.5	165.5	152.5	31	10	24	58	156	145.5
	8	53	167.5	166	37.5	36	62.5	91.5	162.5	140
	9	120	123	127	52.5	22.5	40.5	47.5	63.5	79
	10	148.5	146	151.5	35	27	21	61.5	90	85.5
	11	86.5	111	103.5	72.5	41	23.5	52	113	111.5
	12	126.5	168	171.5	48.5	37	88.5	112.5	161.5	163.5
	13				55	69	71	121	146	138
	Mean	111.5	142.5	147.4	44.92	29.23	41.62	87.08	125.6	127.1
	SEM	11.81	6.014	5.255	5.816	6.488	7.923	8.939	8.306	7.37
	Data were analyzed using two-way ANOVA with post hoc Tukey’s multiple comparison, P < 0.05.
3	The electrophysiological responses of the lateral sensilla styloconica on the maxillary galea of larvae in the wild type (WT) and two mutants of H. armigera to fucose (spikes/s)
	Replicate	WT			Gr10-/-			Gr6-/-
		Fucose 1 mM	Fucose 10 mM	Fucose 100 mM	Fucose 1 mM	Fucose 10 mM	Fucose 100 mM	Fucose 1 mM	Fucose 10 mM	Fucose 100 mM
	1	63.5	55.5	35.5	9.5	51	80.5	0	0	0
	2	1	123.5	112.5	11	69	86.5	0	0	16
	3	4	50	4	25	70	98.5	12.5	65.5	0
	4	12	33.5	22	0	39	26.5	8.5	1.5	0
	5	0	65	115	25.5	57	29.5	0	2.5	0
	6	72	75	72.5	56.5	60.5	59	12	5	0
	7	79	52	89	25.5	107	80	0	0	0
	8	0	121	117.5	55.5	41	40.5	0	7.5	0
	9	4	33	16	32	66.5	44	0	10	18.5
	10	28.5	42.5	29.5	34	84	84.5	28.5	21	0
	11	79	74	86.5	93.5	103.5	67.5	1	0	0
	12	35	75	73	19	74.5	88.5	0	0	15
	13				29.5	69.5	79	0	66	0
	Mean	31.5	66.67	64.42	32.04	68.65	66.5	4.808	13.77	3.808
	SEM	9.537	8.622	11.92	6.802	5.729	6.687	2.382	6.608	2.017
	Data were analyzed using two-way ANOVA with post hoc Tukey’s multiple comparison, P < 0.05.
4	The electrophysiological responses of the lateral sensilla styloconica on the maxillary galea of larvae in the wild type (WT) and two mutants of H. armigera to 10 mM sinigrin
	Replicate	WT	Gr10-/-	Gr6-/-
	1	146.5	133	135
	2	104	116.5	151
	3	111	104	135
	4	109	30	151
	5	139	155.5	93
	6	164.5	142	94
	7	136	115	142
	8	106.5	86	134
	9	89	144	128
	10	142	138.5	133
	11	133	149	100
	12	159.5	141	141
	13		126	91
	Data were analyzed by one-way ANOVA with Tukey's HSD test, P < 0.05.

## Sheet: Figure 6D
Figure 6D
1	The electrophysiological responses of the contact chemosensilla on the antennae of female adults in the wild type (WT) and two mutants of H. armigerato 2 mM KCl (spikes/s)
	Replicate	WT	Gr10-/-	Gr6-/-
	1	14	4	17.5
	2	7	7	7
	3	10	17	2
	4	10	10.5	7
	5	10	0	18
	6	3	9	17
	7	2	18.5	21
	8	2	16	33
	9	19	10	10
	10	0	8	11
	11	9	6	13
	12	10	22	14
	13	5	16	24
	14	19	0	0
	15	13	18	11
	16	9	1	13
	17	10	26	9
	18	5	17	13
	19	21	25
	20	3	15
	Data were analyzed by one-way ANOVA with Tukey's HSD test, P < 0.05
2	The electrophysiological responses of the contact chemosensilla on the antennae of female adults in the wild type (WT) and two mutants of H. armigera to sucrose (spikes/s)
	Replicate	WT		Gr10-/-		Gr6-/-
		Sucrose 10 mM	Sucrose 100 mM	Sucrose 10 mM	Sucrose 100 mM	Sucrose 10 mM	Sucrose 100 mM
	1	8.5	21	38.5	30	11	0
	2	42	39	22.5	29	16	8
	3	20	17.5	33	21.5	22	2
	4	53	41	24.5	19	13.5	0
	5	43.5	22	25	32.5	0	2
	6	29	36	73.5	24	8	8.5
	7	43	40	33.5	24.5	4	1
	8	7	21	38	25.5	37.5	1.5
	9	24	17	37.5	13.5	18	0
	19	23	9	11	16	0	0
	11	26	8	34	10	0	0
	12	27	37	16	43	2	0.5
	13	15	27	32	20	11.5	8
	14	74	15	21	43	0	0
	15	37	22	34	17	26	1
	16	20	26	30	17	5	2
	17	50	11	37	26.5	0	3
	18	40	45	23	20	5	1.5
	19	12	22	27	16
	20	43	9	30	23.5
	Mean	31.85	24.28	31.05	23.58	9.972	2.167
	SEM	3.791	2.622	2.799	1.958	2.509	0.6848
	Data were analyzed by two-way ANOVA with post hoc Tukey’s multiple comparison, P < 0.05
3	The electrophysiological responses of the contact chemosensilla on the antennae of female adults in the wild type (WT) and two mutants of H. armigerato fucose (spikes/s)
	Replicate	WT		Gr10-/-		Gr6-/-
		Fucose 10 mM	Fucose 100 mM	Fucose 10 mM	Fucose 100 mM	Fucose 10 mM	Fucose 100 mM
	1	52.5	32	39.5	22	16.5	2
	2	28	23	41	28	15	5
	3	64	32	23	31	15	14
	4	33	23	18.5	34	0	0.5
	5	49	102	29.5	43	5	11.5
	6	32	39	77.5	42	2.5	8
	7	74	19	27.5	25	10	2
	8	47	50	34	22	32.5	5
	9	48	47	27.5	41	9	0
	10	24	57	19.5	24	0	0
	11	8	20	34	23	4	3.5
	12	18	13	28.5	34	3	3.5
	13	33	35	38	66	6	1
	14	31	14	23.5	20	0	0
	15	14	33	54	60	11	5
	16	20	33	18.5	41	0	5
	17	30	15	30.5	31	13.5	11
	18	25	15	32.5	31	12	2.5
	19	38	51	36	33
	20	32	42	45.5	35
	Mean	35.03	34.75	33.93	34.3	8.611	4.417
	SEM	3.702	4.64	3.076	2.711	1.951	0.9936
	Data were analyzed using two-way ANOVA with post hoc Tukey’s multiple comparison, P < 0.05
4	The electrophysiological responses of the contact chemosensilla on the antennae of female adults in the wild type (WT) and two mutants of H. armigera to 100 mM fructose (spikes/s)
	Replicate	WT	Gr10-/-	Gr6-/-
	1	17.5	32.5	3
	2	62.5	26.5	17
	3	23	24.5	20
	4	67	17	0
	5	31	25	13
	6	66	46.5	13
	7	32	24.5	2
	8	33	26.5	28
	9	23	26	1.5
	10	24	9.5	0
	11	18	10.5	10
	12	15	27	14
	13	7	9	3
	14	11	59	0
	15	28	39	8
	16	14	23	0
	17	17	40.5	3.5
	18	22	20.5	10.5
	19	14	23.5
	20	23	13
	Data were analyzed by one-way ANOVA with Tukey's HSD test, P < 0.05
5	The electrophysiological responses of the contact chemosensilla on the antennae of female adults in the wild type (WT) and two mutants of H. armigerato 10 mM nicotine (spikes/s)
	Replicate	WT	Gr10-/-	Gr6-/-
	1	26	17	38
	2	13.5	24	40
	3	18	34	4
	4	13	19	16
	5	38	60	47
	6	40	23	86
	7	27	41	47
	8	3	17	4
	9	52	27	6
	10	13	20	3
	11	20	19	17
	12	27	28	66
	13	45	14	20
	14	25	36	0
	15	61	26	23
	16	29	17	17
	17	44	31	73
	18	15	47
	19	19	20
	20	12	21
	Data were analyzed by one-way ANOVA with Tukey's HSD test, P < 0.05

## Sheet: Figure 6F
Figure 6F
1	The electrophysiological responses of the contact chemosensilla on the fore leg tarsi of female adults in the wild type (WT) and two mutants of H. armigera to 2 mM KCl (spikes/s)
	Replicate	WT	Gr10-/-	Gr6-/-
	1	1	2	7
	2	8	10	9
	3	1	6	13
	4	8	13	10
	5	11	12	17
	6	7.5	13	4
	7	1	5	19
	8	13	3	6
	9	12.5	5	0
	10	5	3	3
	11	8.5	6	16
	12	18.5	2	22
	13	0.5	8.5	12
	14	12	16	0
	15	20.5	12	0
	16	10	5	0
	17	10.5	13	0
	18	31	4	25
	Data were analyzed by one-way ANOVA with Tukey's HSD test, P < 0.05.
2	The electrophysiological responses of the contact chemosensilla on the fore leg tarsi of female adults in the wild type (WT) and two mutants of H. armigera to sucrose (spikes/s)
	Replicate	WT		Gr10-/-		Gr6-/-
		Sucrose 10 mM	Sucrose 100 mM	Sucrose 10 mM	Sucrose 100 mM	Sucrose 10 mM	Sucrose 100 mM
	1	7	24	22	43	23	15
	2	29	19	17	16	11	6
	3	43	63	31	26	9	11
	4	17	27	28	27	10	6
	5	21	22	37	44	12	12
	6	29	30	22	48	6	6
	7	26	43	26	23	12	15
	8	9	11	29	16	18	4
	9	27	26	21	30	0	0
	10	24	29	33	14	19	0
	11	18	43	13	23	6	3
	12	24	14	29	36	19	8
	13	54	60	5	22	6	9
	14	15	65	31	48	14	18
	15	33	24	29	29	13	25
	16	22	23	36	65	13	24
	17	30	14	15	17	4	0
	18	16	15	21	17	21	22
	Mean	24.67	30.67	24.72	30.22	12	10.22
	SEM	2.675	4.032	1.993	3.356	1.482	1.914
	Data were analyzed by two-way ANOVA with post hoc Tukey’s multiple comparison, P < 0.05
3	The electrophysiological responses of the contact chemosensilla on the fore leg tarsi of female adults in the wild type (WT) and two mutants of H. armigera to fucose (spikes/s)
	Replicate	WT		Gr10-/-		Gr6-/-
		Fucose 10 mM	Fucose 100 mM	Fucose 10 mM	Fucose 100 mM	Fucose 10 mM	Fucose 100 mM
	1	28	32	31	29	11	12
	2	11	9	16	16	9	1
	3	30	55	28	34	12	13
	4	39	23	16	22	11	10
	5	26	20	30	36	18	6
	6	25	30	24	45	5	1
	7	25	41	23	19	13	10
	8	23	13	14	23	9	2
	9	10	26	25	30	0	0
	10	26	42	17	26	24	9
	11	23	2	17	28	7	14
	12	14	32	21	26	24	22
	13	25	41	22	29	2	9
	14	49	17	30	39	13	17
	15	9	40	33	42	6	5
	16	27	43	24	29	15	22
	17	25	25	33	13	2	6
	18	16	22	20	36	31	26
	Mean	23.94	28.5	23.56	29	11.78	10.28
	SEM	2.342	3.226	1.46	2.044	1.955	1.813
	Data were analyzed using two-way ANOVA with post hoc Tukey’s multiple comparison, P < 0.05.
4	The electrophysiological responses of the contact chemosensilla on the fore leg tarsi of female adults in the wild type (WT) and two mutants of H. armigera to 100 mM fructose (spikes/s)
	Replicate	WT	Gr10-/-	Gr6-/-
	1	23	27	16
	2	29	12	7
	3	33	18	14
	4	14	14	11
	5	17	19	15
	6	20	35	14
	7	39	17	5
	8	7	15	12
	9	11	17	0
	10	22	14	7
	11	10	37	4
	12	19	16	11
	13	49	13	6
	14	16	33	1
	15	37	25	10
	16	23	30	2
	17	16	25	3
	18	14	17	10
	Data were analyzed by one-way ANOVA with Tukey's HSD test, P < 0.05.
5	The electrophysiological responses of the contact chemosensilla on the fore leg tarsi of female adults in the wild type (WT) and two mutants of H. armigerato 10 mM nicotine (spikes/s)
	Replicate	WT	Gr10-/-	Gr6-/-
	1	4	18	40
	2	11	1	8
	3	15	27	29
	4	44	6	18
	5	19	13	46
	6	19	19	22
	7	19	27	2
	8	21	7	8
	9	17	44	17
	10	17	17	18
	11	10	2	22
	12	19	21	6
	13	5	28	2
	14	40	16	2
	15	19	23
	16	21	29
	17	11	20
	18	25	23
	Data were analyzed by one-way ANOVA with Tukey's HSD test, P < 0.05.

## Sheet: Figure 6H
Figure 6H
1	The electrophysiological responses of the contact chemosensilla on the proboscis of female adults in the wild type (WT) and two mutants of H. armigerato 2 mM KCl (spikes/s)
	Replicate	WT	Gr10-/-	Gr6-/-
	1	0	0	0
	2	0	0	0
	3	0	0	2
	4	0	0	5
	5	0	0	3
	6	0	0	0
	7	0	1	0
	8	2	0	0
	9	0	0	0
	10	0	0	2
	11	0	3	0
	12	0	2	0
	13	0	0	0
	14	0	0	0
	15	0	3	0
	16	0	0	0
	17	0	1	0
	18	0	0	0
	Data were analyzed by one-way ANOVA with Tukey's HSD test, P < 0.05.
2	The electrophysiological responses of the contact chemosensilla on the proboscis of female adults in the wild type (WT) and two mutants of H. armigerato sucrose (spikes/s)
		WT		Gr10-/-		Gr6-/-
	Replicate	Sucrose 10 mM	Sucrose 100 mM	Sucrose 10 mM	Sucrose 100 mM	Sucrose 10 mM	Sucrose 100 mM
	1	0	33	25	27	0	0
	2	0	17	10	32	0	0
	3	0	90	6	56	0	0
	4	6	63	12	45	0	12
	5	24	67	7	45	0	0
	6	15	56	11	53	0	0
	7	47	50	6	82	0	0
	8	8	12	6	33	0	0
	9	26	20	20	42	0	0
	10	29	37	13	40	0	0
	11	0	59	6	27	0	0
	12	0	97	35	57	0	0
	13	0	45	0	38	3	0
	14	8	25	8	61	0	0
	15	17	46	11	46	0	0
	16	41	54	7	61	0	0
	17	10	40	33	44	0	0
	18	14		18	58	0
	Mean	13.61	47.71	13	47.06	0.1667	0.7059
	SEM	3.441	5.742	2.274	3.308	0.1667	0.7059
	Data were analyzed by two-way ANOVA with post hoc Tukey’s multiple comparison, P < 0.05
3	The electrophysiological responses of the contact chemosensilla on the proboscis of female adults in the wild type (WT) and two mutants of H. armigerato fucose (spikes/s)
		WT		Gr10-/-		Gr6-/-
	Replicate	Fucose 10 mM	Fucose 100 mM	Fucose 10 mM	Fucose 100 mM	Fucose 10 mM	Fucose 100 mM
	1	11	26	6	35	0	0
	2	5	47	20	47	0	0
	3	0	90	7	68	0	0
	4	9	24	23	66	0	0
	5	10	57	58	67	5	0
	6	14	61	6	36	0	0
	7	25	58	0	28	0	0
	8	39	81	9	36	0	0
	9	40	50	14	64	0	0
	10	44	105	30	33	0	0
	11	1	59	11	39	0	0
	12	0	23	0	58	0	0
	13	0	28	16	100	16	0
	14	40	81	70	48	0	0
	15	20	34	27	42	0	0
	16	30	27	4	43	0	0
	17	41	20	19	27	0	0
	18	28	48	53	73	0	0
	Mean	19.83	51.06	20.72	50.56	1.167	0
	SEM	3.831	5.997	4.801	4.544	0.9156	0
	Data were analyzed by two-way ANOVA with post hoc Tukey’s multiple comparison, P < 0.05
4	The electrophysiological responses of the contact chemosensilla on the proboscis of female adults in the wild type (WT) and two mutants of H. armigera to 100 mM fructose (spikes/s)
	Replicate	WT	Gr10-/-	Gr6-/-
	1	37	37	0
	2	23	10	0
	3	51	28	3
	4	11	39	0
	5	17	30	0
	6	37	33	0
	7	25	10	0
	8	22	24	32
	9	15	39	0
	10	28	33	0
	11	29	22	0
	12	30	23	0
	13	31	31	0
	14	71	39	0
	15	21	32	0
	16	56	17	0
	17	58	47	0
	18	27	65	0
	Data were analyzed by one-way ANOVA wiht Tukey's HSD test, P < 0.05.
5	The electrophysiological responses of the contact chemosensilla on the proboscis of female adults in the wild type (WT) and two mutants of H. armigerato 10 mM nicotine (spikes/s)
	Replicate	WT	Gr10-/-	Gr6-/-
	1	0	0	0
	2	6	0	0
	3	0	3	0
	4	0	1	0
	5	3	0	0
	6	0	0	0
	7	0	0	0
	8	0	0	0
	9	0	0	0
	10	0	3	0
	11	0	0	0
	12	0	1	0
	13	0	0	0
	14	0	3	0
	15	0	0	0
	16	0	0	0
	17	0	0	0
	18	0	0	0
	Data were analyzed by one-way ANOVA with Tukey's HSD test, P < 0.05.
