# Supplementary material for: The larva and adult of Helicoverpa armigera use differential gustatory receptors to sense sucrose
Source: eLife. 2024 May 30;12:RP91711. doi: 10.7554/eLife.91711 (PMC11139476; doi:10.7554/eLife.91711)
Supplement: Figure 7—figure supplement 1—source data 1. — (Figure 7—figure supplement 1A) Feeding area of the WT, Gr10-/- and Gr6-/- 5th instar larvae of H. armigera in two-choice tests of 10 mM fructose. (Figure 7—figure supplement 1B) Feeding area of the WT, Gr10-/- and Gr6-/- 5th instar larvae of H. armigera in two-choice tests of 100 mM fructose. [file elife-91711-fig7-figsupp1-data1.xlsx]

## Sheet: Figure 7-Figure Supplement 1A
Figure 7-Figure Supplement 1A
1	Feeding area of the wild type 5th-instar larvae of H. armigera in two-choice tests: Fructose vs Control
	Replicate	Control (cm2)	Fructose 10 mM (cm2)	Preference Index (PI)
	1	0.96064	0.83904	-0.0675676
	2	0.80864	0.91808	0.0633803
	3	0.83904	0.94848	0.0612245
	4	0.8816	0.90592	0.0136054
	5	0.87552	0.90592	0.0170648
	6	0.86336	0.912	0.0273973
	7	0.82688	0.8512	0.0144928
	8	0.85728	0.93024	0.0408163
	9	0.80864	0.82688	0.0111524
	10	0.76608	0.89376	0.0769231
	11	0.78432	0.87552	0.0549451
	12	0.86336	0.87552	0.00699301
	13	0.77824	0.91808	0.0824373
	14	0.88768	0.86336	-0.0138889
	15	0.65664	0.90592	0.159533
	16	0.86336	0.89984	0.0206897
	17	0.79648	1.14304	0.178683
	18	0.84512	1.17952	0.165165
	19	0.47424	0.86944	0.294118
	20	0.80864	0.96064	0.0859107
	Mean	0.812288	0.92112	0.0646538
	SEM	0.02243	0.01994	0.01827
	Data were analyzed by the paired t test, P < 0.05.
2	Feeding area of the Gr10-/- 5th-instar larvae of H. armigera in two-choice tests: Fructose vs Control
	Replicate	Control (cm2)	Fructose 10 mM (cm2)	Preference Index (PI)
	1	0.84512	0.89984	0.0313589
	2	0.80864	1.0944	0.15016
	3	0.76608	0.86336	0.0597015
	4	0.5472	0.85728	0.220779
	5	0.78432	0.98496	0.113402
	6	0.80864	0.89984	0.0533808
	7	0.83904	0.80864	-0.0184502
	8	0.86944	0.72352	-0.0916031
	9	0.86336	0.88768	0.0138889
	10	0.81472	1.22208	0.2
	11	0.83904	0.8512	0.00719424
	12	0.82688	1.19776	0.183183
	13	0.86336	0.77216	-0.0557621
	14	0.91808	1.47136	0.231552
	15	0.86944	0.74176	-0.0792453
	16	0.89376	0.83904	-0.0315789
	17	0.70528	0.82688	0.0793651
	18	0.68096	0.72352	0.030303
	19	0.79648	0.83904	0.0260223
	20	0.83904	1.23424	0.190616
	Mean	0.808944	0.936928	0.0657134
	SEM	0.01885	0.04527	0.02271
	Data were analyzed by the paired t test, P < 0.05.
3	Feeding area of the Gr6-/- 5th-instar larvae of H. armigera in two-choice tests: Fructose vs Control
	Replicate	Control (cm2)	Fructose 10 mM (cm2)	Preference Index (PI)
	1	0.86944	0.87552	0.00348432
	2	0.84512	0.91808	0.0413793
	3	0.93632	0.93632	0
	4	0.7296	0.96672	0.139785
	5	0.64448	0.86944	0.148594
	6	0.76	0.94848	0.11032
	7	0.83296	0.83296	0
	8	0.68704	0.86944	0.117188
	9	0.77216	0.86336	0.0557621
	10	0.68096	0.84512	0.10757
	11	0.67488	0.86336	0.12253
	12	0.81472	0.85728	0.0254545
	13	0.83904	0.90592	0.0383275
	14	0.79648	1.5808	0.329923
	15	0.88768	0.85728	-0.0174216
	16	0.86944	0.89376	0.0137931
	17	0.83296	0.89984	0.0385965
	18	0.77216	0.87552	0.0627306
	19	0.87552	0.93632	0.033557
	20	0.89984	0.92416	0.0133333
	Mean	0.80104	0.925984	0.0692453
	SEM	0.01867	0.03544	0.01786
	Data were analyzed by the paired t test, P < 0.05.

## Sheet: Figure 7-Figure Supplement 1B
Figure 7-Figure Supplement 1B
1	Feeding area of the wild type 5th-instar larvae of H. armigera in two-choice tests: Fructose vs Control
	Replicate	Control (cm2)	Fructose 100 mM (cm2)	Preference Index (PI)
	1	0.83904	0.96672	0.0707071
	2	0.95456	1.16128	0.0977011
	3	0.8512	0.89984	0.0277778
	4	0.72352	0.89984	0.108614
	5	0.8816	0.89376	0.00684932
	6	0.77216	0.90592	0.0797101
	7	0.80864	0.88768	0.046595
	8	0.49856	0.83904	0.254545
	9	0.8512	0.9424	0.0508475
	10	0.456	1.39232	0.506579
	11	0.67488	0.84512	0.112
	12	0.912	0.83296	-0.0452962
	13	0.81472	0.94848	0.0758621
	14	0.16416	1.5808	0.811847
	15	0.90592	0.99104	0.0448718
	16	0.76608	0.83904	0.0454545
	17	0.38912	0.86336	0.378641
	18	0.5472	0.912	0.25
	19	0.72352	0.95456	0.137681
	20	0.83904	0.89984	0.034965
	Mean	0.718656	0.9728	0.154798
	SEM	0.04606	0.04306	0.0456
	Data were analyzed by the paired t test, P < 0.05.
2	Feeding area of the Gr10-/- 5th-instar larvae of H. armigera in two-choice tests: Fructose vs Control
	Replicate	Control (cm2)	Fructose 100 mM (cm2)	Preference Index (PI)
	1	0.79648	0.8208	0.0150376
	2	0.8512	1.13696	0.143731
	3	0.912	0.912	0
	4	0.92416	0.87552	-0.027027
	5	0.87552	0.86944	-0.00348432
	6	0.75392	0.83296	0.0498084
	7	0.80864	1.36192	0.254902
	8	0.82688	0.86336	0.0215827
	9	0.84512	1.1248	0.141975
	10	0.84512	0.89984	0.0313589
	11	0.65664	0.93024	0.172414
	12	0.90592	0.9424	0.0197368
	13	0.8208	0.912	0.0526316
	14	0.77824	0.88768	0.0656934
	15	0.77824	0.83296	0.0339623
	16	0.77824	1.02752	0.138047
	17	0.40736	0.86944	0.361905
	18	0.14592	1.36192	0.806452
	19	0.84512	0.86336	0.0106762
	20	0.608	0.87552	0.180328
	Mean	0.758176	0.960032	0.123486
	SEM	0.04176	0.03634	0.04221
	Data were analyzed by the paired t test, P < 0.05.
3	Feeding area of the Gr6-/- 5th-instar larvae of H. armigera in two-choice tests: Fructose vs Control
	Replicate	Control (cm2)	Fructose 100 mM (cm2)	Preference Index (PI)
	1	0.77216	0.8816	0.0661765
	2	0.89984	0.88768	-0.00680272
	3	0.92416	1.3072	0.171662
	4	0.68096	0.8512	0.111111
	5	0.71744	0.77824	0.0406504
	6	0.74784	0.77216	0.016
	7	0.77824	0.88768	0.0656934
	8	0.89984	0.92416	0.0133333
	9	0.82688	0.86336	0.0215827
	10	0.86944	0.92416	0.0305085
	11	0.77216	1.14304	0.193651
	12	0.85728	0.81472	-0.0254545
	13	0.456	1.37408	0.501661
	14	0.7904	0.8208	0.0188679
	15	0.86944	1.39232	0.231183
	16	0.66272	0.912	0.158301
	17	0.80864	0.94848	0.0795848
	18	0.62016	0.89376	0.180723
	19	0.6384	0.85728	0.146341
	20	0.89984	1.13088	0.113772
	Mean	0.774592	0.96824	0.106427
	SEM	0.02654	0.04313	0.02663
	Data were analyzed by the paired t test, P < 0.05.
