# Supplementary material for: The larva and adult of Helicoverpa armigera use differential gustatory receptors to sense sucrose
Source: eLife. 2024 May 30;12:RP91711. doi: 10.7554/eLife.91711 (PMC11139476; doi:10.7554/eLife.91711)
Supplement: Figure 7—source data 1. — (Figure 7A) Feeding area of the WT, Gr10-/- and Gr6-/- 5th instar larvae of H. armigera in two-choice tests of 10 mM sucrose. (Figure 7B) Feeding area of the WT, Gr10-/- and Gr6-/- 5th instar larvae of H. armigera in two-choice tests of 100 mM sucrose. (Figure 7C) The feeding amount of the 5th instar larvae in no-choice tests of cabbage leaf, corn seed, pea seed, pepper fruit, and tomato fruit. (Figure 7D) Proboscis extension reflex (PER) in females of the WT and Gr10-/- and Gr6-/- mutants of H. armigera upon antennal stimulation by sucrose concentrations. (Figure 7E) PER in females of the WT and Gr10-/- and Gr6-/- mutants of H. armigera upon antennal stimulation by fucose concentrations. (Figure 7F) PER in females of the WT and Gr10-/- and Gr6-/- mutants of H. armigera upon antennal stimulation by fructose concentrations. (Figure 7G) PER in females of the WT and Gr10-/- and Gr6-/- mutants of H. armigera upon tarsal stimulation by sucrose concentrations. (Figure 7H) PER in females of the WT and Gr10-/- and Gr6-/- mutants of H. armigera upon tarsal stimulation by fucose concentrations. (Figure 7I) PER in females of the WT and Gr10-/- and Gr6-/- mutants of H. armigera upon tarsal stimulation by fructose concentrations. [file elife-91711-fig7-data1.xlsx]

## Sheet: Figure 7A
Figure 7A
1	Feeding area of the wild type 5th-instar larvae of H. armigera in two-choice tests: 10 mM sucrose vs Control
	Replicate	Control (cm2)	Sucrose 10 mM (cm2)	Preference Index (PI)
	1	0.81472	1.368	0.253482
	2	1.02144	1.38624	0.151515
	3	0.80864	1.5808	0.323155
	4	0.7904	0.90592	0.0681004
	5	0.77216	0.90592	0.0797101
	6	0.9728	0.8512	-0.0666667
	7	0.89984	1.38016	0.210667
	8	0.90592	1.30112	0.179063
	9	0.84512	1.49568	0.277922
	10	0.7904	0.152	-0.677419
	11	0.93024	0.88768	-0.0234114
	12	0.8512	1.2464	0.188406
	13	0.63232	0.8816	0.164659
	14	0.93632	0.92416	-0.00653595
	15	0.15808	1.5808	0.818182
	16	0.89376	1.1248	0.114458
	17	0.95456	1.08224	0.0626866
	18	0.86944	1.00928	0.0744337
	19	0.87552	1.1552	0.137725
	20	0.92416	1.07008	0.0731707
	Mean	0.832352	1.11446	0.120165
	SEM	0.04037	0.07401	0.05872
	Data were analyzed by the paired t test, P < 0.05.
2	Feeding area of the Gr10-/- 5th-instar larvae of H. armigera in two-choice tests: 10 mM sucrose vs Control
	Replicate	Control (cm2)	Sucrose 10 mM (cm2)	Preference Index (PI)
	1	0.77824	0.8208	0.026616
	2	0.93632	1.16736	0.109827
	3	0.88768	0.86944	-0.0103806
	4	0.76608	0.94848	0.106383
	5	0.89984	0.93024	0.0166113
	6	0.8512	0.912	0.0344828
	7	0.88768	0.9424	0.0299003
	8	0.912	0.8816	-0.0169492
	9	0.87552	0.91808	0.0237288
	10	0.89376	0.8512	-0.0243902
	11	0.86336	0.82688	-0.0215827
	12	0.81472	0.83904	0.0147059
	13	0.96064	0.96672	0.00315457
	14	0.77216	0.9728	0.114983
	15	1.01536	0.85728	-0.0844156
	16	0.85728	0.76	-0.0601504
	17	0.91808	0.81472	-0.0596491
	18	0.58976	0.82688	0.167382
	19	0.93024	0.78432	-0.0851064
	20	0.8208	0.76608	-0.0344828
	Mean	0.861536	0.882816	0.0125333
	SEM	0.02023	0.02085	0.01535
	Data were analyzed by the paired t test, P < 0.05.
3	Feeding area of the Gr6-/- 5th-instar larvae of H. armigera in two-choice tests: 10 mM sucrose vs Control
	Replicate	Control (cm2)	Sucrose 10 mM (cm2)	Preference Index (PI)
	1	0.35872	1.51392	0.616883
	2	0.62624	1.0032	0.231343
	3	0.58976	0.95456	0.23622
	4	0.93632	0.99104	0.0283912
	5	0.83904	0.97888	0.0769231
	6	0.83904	0.92416	0.0482759
	7	0.93632	1.1856	0.117479
	8	0.88768	1.38624	0.219251
	9	0.86336	0.89984	0.0206897
	10	0.93024	0.93632	0.00325733
	11	0.84512	0.89376	0.027972
	12	0.88768	1.5808	0.280788
	13	0.83904	1.24032	0.192982
	14	0.85728	0.69312	-0.105882
	15	0.91808	0.83296	-0.0486111
	16	0.9424	1.14912	0.0988372
	17	0.96672	1.08224	0.0563798
	18	0.84512	1.11264	0.136646
	19	0.94848	0.93632	-0.00645161
	20	0.77824	0.96064	0.104895
	Mean	0.831744	1.06278	0.116813
	SEM	0.0332	0.05045	0.03485
	Data were analyzed by the paired t test, P < 0.05.

## Sheet: Figure 7B
Figure 7B
1	Feeding area of the wild type 5th-instar larvae of H. armigera in two-choice tests: 100 mM sucrose vs Control
	Replicate	Control (cm2)	Sucrose 100 mM (cm2)	Preference Index (PI)
	1	0.81472	0.93024	0.0662021
	2	0.71744	0.86944	0.0957854
	3	0.89376	1.30112	0.185596
	4	0.87552	1.1248	0.12462
	5	0.6688	0.87552	0.133858
	6	0.86944	1.35584	0.218579
	7	0.58368	0.86336	0.193277
	8	0.2128	0.91808	0.623656
	9	0.40128	0.83904	0.352941
	10	0.84512	0.84512	0
	11	0.81472	1.19168	0.187879
	12	0.83904	0.9424	0.0580205
	13	0.8208	0.83296	0.00735294
	14	0.83296	1.5808	0.309824
	15	0.87552	0.912	0.0204082
	16	0.82688	1.5808	0.313131
	17	0.79648	0.89984	0.0609319
	18	0.2128	1.29504	0.717742
	19	0.64448	0.93024	0.181467
	20	0.84512	0.83904	-0.00361011
	Mean	0.719568	1.04637	0.192383
	SEM	0.04723	0.05574	0.04368
	Data were analyzed by the paired t test, P < 0.05.
2	Feeding area of the Gr10-/- 5th-instar larvae of H. armigera in two-choice tests: 100 mM sucrose vs Control
	Replicate	Control (cm2)	Sucrose 100 mM (cm2)	Preference Index (PI)
	1	0.0912	1.33152	0.871795
	2	0.96672	1.14304	0.0835735
	3	0.8208	0.91808	0.0559441
	4	0.93632	1.16736	0.109827
	5	0.74176	0.8816	0.0861423
	6	0.89984	0.80864	-0.0533808
	7	0.86336	0.90592	0.024055
	8	0.83904	0.89984	0.034965
	9	0.8816	0.92416	0.023569
	10	0.912	0.95456	0.0228013
	11	0.87552	0.86944	-0.00348432
	12	0.76	0.93024	0.100719
	13	0.6688	0.96064	0.179104
	14	0.8816	0.9424	0.0333333
	15	0.76	0.95456	0.113475
	16	0.9728	1.23424	0.118457
	17	0.78432	0.96672	0.104167
	18	0.76608	0.81472	0.0307692
	19	0.89376	0.86336	-0.017301
	20	0.76608	0.89984	0.080292
	Mean	0.80408	0.968544	0.0999412
	SEM	0.04171	0.03122	0.04244
	Data were analyzed by the paired t test, P < 0.05.
3	Feeding area of the Gr6-/- 5th-instar larvae of H. armigera in two-choice tests: 100 mM sucrose vs Control
	Replicate	Control (cm2)	Sucrose 100 mM (cm2)	Preference Index (PI)
	1	0.77824	0.92416	0.0857143
	2	0.86336	0.9424	0.043771
	3	0.89376	0.93024	0.02
	4	0.80864	0.95456	0.0827586
	5	0.67488	0.97888	0.183824
	6	0.77824	0.96064	0.104895
	7	0.13984	1.46528	0.825758
	8	1.02144	1.5808	0.214953
	9	0.80864	0.90592	0.0567376
	10	0.81472	0.89376	0.0462633
	11	0.77216	0.87552	0.0627306
	12	0.86944	1.02752	0.0833333
	13	0.86336	1.52	0.27551
	14	0.82688	1.46528	0.278515
	15	0.86336	0.93024	0.0372881
	16	0.88768	1.56256	0.275434
	17	0.86336	1.02144	0.083871
	18	0.86944	1.0032	0.0714286
	19	0.93024	0.96672	0.0192308
	20	0.25536	0.94848	0.575758
	Mean	0.779152	1.09288	0.171389
	SEM	0.04731	0.05731	0.04568
	Data were analyzed by the paired t test, P < 0.05.

## Sheet: Figure 7C
Figure 7C
1	The feeding amount of the 5th-instar larvae on cabbage leaf in no-choice tests
	Replicate	WT (g)	Gr10-/- (g)	Gr6-/- (g)
	1	0.0081	0.01	0.0072
	2	0.0084	0.0047	0.0115
	3	0.0109	0.0127	0.008
	4	0.0125	0.0082	0.0055
	5	0.0191	0.0085	0.011
	6	0.0169	0.0085	0.019
	7	0.0001	0.0066	0.0228
	8	0.0184	0.0053	0.0072
	9	0.0131	0.0097	0.0206
	10	0.0201	0.0075	0.01
	11	0.0004	0.0086	0.0012
	12	0.0145	0.0067	0.0134
	13	0.0117	0.0053	0.0106
	14	0.0126	0.0074	0.0073
	15	0.0002	0.0071	0.0105
	16	0.0219	0.0075	0.0074
	17	0.0161	0.004	0.0103
	18	0.0175	0.0107	0.0099
	19	0.0191	0.0117	0.0115
	20	0.0013	0.0052	0.0146
	Mean	0.0121453	0.00779508	0.0109752
	SEM	0.001576	0.0005248	0.001157
	Data were analyzed by one-way ANOVA with Tukey's HSD test, P < 0.05.
2	The feeding amount of H. armigera 5th-instar larvae on corn seed in no-choice tests
	Replicate	WT (g)	Gr10-/- (g)	Gr6-/- (g)
	1	0.0609	0.0207	0.0407
	2	0.0573	0.0429	0.0561
	3	0.035	0.0219	0.0525
	4	0.0508	0.0432	0.0722
	5	0.0775	0.0233	0.0288
	6	0.0439	0.0175	0.0396
	7	0.0539	0.0219	0.0609
	8	0.0721	0.0342	0.0531
	9	0.0725	0.0545	0.0642
	10	0.0466	0.0378	0.0549
	11	0.0507	0.0466	0.0369
	12	0.0511	0.0476	0.0321
	13	0.0382	0.0302	0.016
	14	0.0534	0.0286	0.0242
	15	0.0819	0.0406	0.0475
	16	0.0782	0.0331	0.0387
	17	0.0433	0.0375	0.0283
	18	0.0492	0.0208	0.0913
	19	0.0531	0.0434	0.0736
	20	0.0571	0.055	0.044
	Mean	0.05634	0.03507	0.04778
	SEM	0.003027	0.002606	0.004184
	Data were analyzed by one-way ANOVA with Tukey's HSD test, P < 0.05.
3	The feeding amount of H. armigera 5th-instar larvae on pea seed in no-choice tests
	Replicate	WT (g)	Gr10-/- (g)	Gr6-/- (g)
	1	0.0283	0.0138	0.0695
	2	0.0438	0.0291	0.0423
	3	0.0389	0.0001	0.0299
	4	0.0455	0.0487	0.0397
	5	0.041	0.0519	0.0331
	6	0.0998	0.0286	0.0431
	7	0.1108	0.0343	0.0384
	8	0.0178	0.0267	0.0568
	9	0.0355	0.0043	0.0137
	10	0.0294	0.0001	0.0202
	11	0.0512	0.0066	0.0374
	12	0.0131	0.0329	0.0351
	13	0.0491	0.0216	0.0437
	14	0.0373	0.0701	0.0357
	15	0.0489	0.0093	0.0278
	16	0.0294	0.0377	0.0156
	17	0.0431	0.0497	0.0285
	18	0.0269	0.0089	0.0224
	19	0.0315	0.0282	0.0202
	20	0.0239	0.0321	0.0401
	Mean	0.04226	0.02674	0.03466
	SEM	0.005365	0.004268	0.003024
	Data were analyzed by one-way ANOVA with Tukey's HSD test, P < 0.05.
4	The feeding amount of H. armigera 5th-instar larvae on pepper fruit in no-choice tests
	Replicate	WT (g)	Gr10-/- (g)	Gr6-/- (g)
	1	0.2119	0.0139	0.118
	2	0.1314	0.0289	0.1373
	3	0.1139	0.0426	0.1279
	4	0.1723	0.058	0.145
	5	0.0481	0.0194	0.0937
	6	0.1232	0.0614	0.1323
	7	0.1147	0.0534	0.0635
	8	0.0773	0.0652	0.068
	9	0.0785	0.0607	0.1177
	10	0.0994	0.0698	0.0601
	11	0.0405	0.0838	0.084
	12	0.0713	0.0116	0.0459
	13	0.0804	0.0796	0.0335
	14	0.0504	0.0914	0.1147
	15	0.0773	0.04774	0.0884
	16	0.1214	0.0276	0.0064
	17	0.0659	0.0568	0.0336
	18	0.0778	0.0611	0.1102
	19	0.0616	0.082	0.1143
	20	0.0555	0.0537	0.0942
	Mean	0.09364	0.053432	0.089435
	SEM	0.009711	0.005223	0.008751
	Data were analyzed by one-way ANOVA with Tukey's HSD test, P < 0.05.
5	The feeding amount of H. armigera 5th-instar larvae on tomato fruit in no-choice tests
	Replicate	WT (g)	Gr10-/- (g)	Gr6-/- (g)
	1	0.1121	0.0348	0.0551
	2	0.0715	0.0365	0.0253
	3	0.0527	0.0118	0.0438
	4	0.0301	0.0162	0.1071
	5	0.0893	0.0346	0.0476
	6	0.0593	0.0127	0.0841
	7	0.0476	0.0235	0.0434
	8	0.0677	0.0279	0.0313
	9	0.0583	0.0327	0.0272
	10	0.0513	0.0313	0.0791
	11	0.0579	0.0161	0.0335
	12	0.048	0.0414	0.1029
	13	0.0824	0.0296	0.0495
	14	0.0768	0.0387	0.0401
	15	0.0493	0.0235	0.0312
	16	0.0437	0.0706	0.0593
	17	0.0225	0.0267	0.1159
	18	0.0885	0.038	0.0251
	19	0.0397	0.044	0.0488
	20	0.0718	0.0442	0.0805
	Mean	0.061025	0.03174	0.05654
	SEM	0.004868	0.00302	0.006389
	Data were analyzed by one-way ANOVA with Tukey's HSD test, P < 0.05.

## Sheet: Figure 7D
Figure 7D
	Proboscis extension reflex (PER) in females of the wild type (WT) and Gr10-/- and Gr6-/- mutants of H. armigera upon antennal stimulation by sucrose concentrations (%)
	Replicate	WT				Gr10-/-	Gr10-/-			Gr6-/-
		0 mM	10 mM	100 mM	1000 mM	0 mM	10 mM	100 mM	1000 mM	0 mM	10 mM	100 mM	1000 mM
	1	15	15	55	80	0	20	83.33	100	5	0	0	0
	2	0	35	55	90	3	40	76.67	90	20	10	0	10
	3	0	45	80	90	0	46.67	76.67	86.67	10	0	0	0
	PER in females of the wild type (WT) and Gr10-/- and Gr6-/- mutants of H. armigera upon antennal stimulation by sucrose concentrations (arcsin converted data)
	Replicate	WT				Gr10-/-	Gr10-/-			Gr6-/-
		0 mM	10 mM	100 mM	1000 mM	0 mM	10 mM	100 mM	1000 mM	0 mM	10 mM	100 mM	1000 mM
	1	22.7981	22.7981	47.8939	63.4671	0	26.5785	65.936	90.0456	12.9275	0	0	0
	2	0	36.2896	47.8939	71.6014	9.97928	39.2514	61.1487	71.6014	26.5785	18.4443	0	18.4443
	3	0	42.1518	63.4671	71.6014	0	43.1125	61.1487	68.6209	18.4443	0	0	0
	Data were analyzed using two-way ANOVA with post hoc Tukey’s multiple comparison, P < 0.05.

## Sheet: Figure 7E
Figure 7E
	PER in females of the wild type (WT) and Gr10-/- and Gr6-/- mutants of H. armigera upon antennal stimulation by fucose concentrations (%)
	Replicate	WT				Gr10-/-	Gr10-/-			Gr6-/-
		0 mM	10 mM	100 mM	1000 mM	0 mM	10 mM	100 mM	1000 mM	0 mM	10 mM	100 mM	1000 mM
	1	15	10	80	75	0	3.33	73.33	90	5	0	10	0
	2	0	5	60	80	3	26.67	83.33	73.33	20	10	5	0
	3	0	15	90	85	0	20	70	80	10	0	0	0
	PER in females of the wild type (WT) and Gr10-/- and Gr6-/- mutants of H. armigera upon antennal stimulation by fucose concentrations (arcsin converted data)
	Replicate	WT				Gr10-/-	Gr10-/-			Gr6-/-
		0 mM	10 mM	100 mM	1000 mM	0 mM	10 mM	100 mM	1000 mM	0 mM	10 mM	100 mM	1000 mM
	1	22.7981	18.4443	63.4671	60.0304	0	10.5197	58.9368	71.6014	12.9275	0	18.4443	0
	2	0	12.9275	50.7942	63.4671	9.97928	31.1089	65.936	58.9368	26.5785	18.4443	12.9275	0
	3	0	22.7981	71.6014	67.2476	0	26.5785	56.8179	63.4671	18.4443	0	0	0
	Data were analyzed using two-way ANOVA with post hoc Tukey’s multiple comparison, P < 0.05.

## Sheet: Figure 7F
Figure 7F
	PER in females of the wild type (WT) and Gr10-/- and Gr6-/- mutants of H. armigera upon antennal stimulation by fructose concentrations (%)
	Replicate	WT				Gr10-/-	Gr10-/-			Gr6-/-
		0 mM	10 mM	100 mM	1000 mM	0 mM	10 mM	100 mM	1000 mM	0 mM	10 mM	100 mM	1000 mM
	1	15	5	30	80	0	13.33	16.67	76.67	5	0	10.5	10.5
	2	0	20	40	78.9	3	10	23.33	93.33	0	0	0	45
	3	0	5.26	22	75	0	20	23.33	80	0	2	10.5	30
	PER in females of the wild type (WT) and Gr10-/- and Gr6-/- mutants of H. armigera upon antennal stimulation by fructose concentrations (arcsin converted data)
	Replicate	WT				Gr10-/-	Gr10-/-			Gr6-/-
		0 mM	10 mM	100 mM	1000 mM	0 mM	10 mM	100 mM	1000 mM	0 mM	10 mM	100 mM	1000 mM
	1	22.7981	12.9275	33.2278	63.4671	0	21.4248	24.1096	61.1487	12.9275	0	18.9168	18.9168
	2	0	26.5785	39.2514	62.6868	9.97928	18.4443	28.8969	75.071	0	0	0	42.1518
	3	0	13.2653	27.9863	60.0304	0	26.5785	28.8969	63.4671	0	8.13423	18.9168	33.2278
	Data were analyzed using two-way ANOVA with post hoc Tukey’s multiple comparison, P < 0.05.

## Sheet: Figure 7G
Figure 7G
	PER in females of the wild type (WT) and Gr10-/- and Gr6-/- mutants of H. armigera upon tarsal stimulation by sucrose concentrations (%)
	Replicate	WT				Gr10-/-	Gr10-/-			Gr6-/-
		0 mM	10 mM	100 mM	1000 mM	0 mM	10 mM	100 mM	1000 mM	0 mM	10 mM	100 mM	1000 mM
	1	0	30	35	75	0	23.33	63.33	83.33	0	0	10	30
	2	0	25	50	90	3	26.67	63.33	80	10	10	20	35
	3	0	45	85	95	0	16.67	63.33	80	0	10	5	55
	PER in females of the wild type (WT) and Gr10-/- and Gr6-/- mutants of H. armigera upon tarsal stimulation by sucrose concentrations (arcsin converted data)
	Replicate	WT				Gr10-/-	Gr10-/-			Gr6-/-
		0 mM	10 mM	100 mM	1000 mM	0 mM	10 mM	100 mM	1000 mM	0 mM	10 mM	100 mM	1000 mM
	1	0	33.2278	36.2896	60.0304	0	28.8969	52.7578	65.936	0	0	18.4443	33.2278
	2	0	30.0152	45.0228	71.6014	9.97928	31.1089	52.7578	63.4671	18.4443	18.4443	26.5785	36.2896
	3	0	42.1518	67.2476	77.1181	0	24.1096	52.7578	63.4671	0	18.4443	12.9275	47.8939
	Data were analyzed using two-way ANOVA with post hoc Tukey’s multiple comparison, P < 0.05.

## Sheet: Figure 7H
Figure 7H
	PER in females of the wild type (WT) and Gr10-/- and Gr6-/- mutants of H. armigera upon tarsal stimulation by fucose concentrations (%)
	Replicate	WT				Gr10-/-	Gr10-/-			Gr6-/-
		0 mM	10 mM	100 mM	1000 mM	0 mM	10 mM	100 mM	1000 mM	0 mM	10 mM	100 mM	1000 mM
	1	0	45	55	75	0	10	60	83.33	0	20	0	0
	2	0	10	90	95	3	13.33	46.67	80	10	0	5	5
	3	0	5.26	60	100	0	26.67	60	76.67	0	5.26	10	0
	PER in females of the wild type (WT) and Gr10-/- and Gr6-/- mutants of H. armigera upon tarsal stimulation by fucose concentrations (arcsin converted data)
	Replicate	WT				Gr10-/-	Gr10-/-			Gr6-/-
		0 mM	10 mM	100 mM	1000 mM	0 mM	10 mM	100 mM	1000 mM	0 mM	10 mM	100 mM	1000 mM
	1	0	42.1518	47.8939	60.0304	0	18.4443	50.7942	65.936	0	26.5785	0	0
	2	0	18.4443	71.6014	77.1181	9.97928	21.4248	43.1125	63.4671	18.4443	0	12.9275	12.9275
	3	0	13.2653	50.7942	90.0456	0	31.1089	50.7942	61.1487	0	13.2653	18.4443	0
	Data were analyzed using two-way ANOVA with post hoc Tukey’s multiple comparison, P < 0.05.

## Sheet: Figure 7I
Figure 7I
	PER in females of the wild type (WT) and Gr10-/- and Gr6-/- mutants of H. armigera upon tarsal stimulation by fructose concentrations (%)
	Replicate	WT				Gr10-/-	Gr10-/-			Gr6-/-
		0 mM	10 mM	100 mM	1000 mM	0 mM	10 mM	100 mM	1000 mM	0 mM	10 mM	100 mM	1000 mM
	1	0	20	35	70	0	23.33	26.67	80	0	10	20	10
	2	0	10.5	33.33	75	3	23.33	30	80	10	0	36.8	36.8
	3	0	25	25	83	0	16.67	36.67	66.67	0	5.26	40	45
	PER in females of the wild type (WT) and Gr10-/- and Gr6-/- mutants of H. armigera upon tarsal stimulation by fructose concentrations (arcsin converted data)
	Replicate	WT				Gr10-/-	Gr10-/-			Gr6-/-
		0 mM	10 mM	100 mM	1000 mM	0 mM	10 mM	100 mM	1000 mM	0 mM	10 mM	100 mM	1000 mM
	1	0	26.5785	36.2896	56.8179	0	28.8969	31.1089	63.4671	0	18.4443	26.5785	18.4443
	2	0	18.9168	35.2802	60.0304	9.97928	28.8969	33.2278	63.4671	18.4443	0	37.3652	37.3652
	3	0	30.0152	30.0152	65.6832	0	24.1096	37.2879	54.7654	0	13.2653	39.2514	42.1518
	Data were analyzed using two-way ANOVA with post hoc Tukey’s multiple comparison, P < 0.05.
