# Supplementary material for: The larva and adult of Helicoverpa armigera use differential gustatory receptors to sense sucrose
Source: eLife. 2024 May 30;12:RP91711. doi: 10.7554/eLife.91711 (PMC11139476; doi:10.7554/eLife.91711)
Supplement: Supplementary file 1. [file elife-91711-supp1.xlsx]

## Sheet: Sheet1
	Supplementary file 1. GenBank accession numbers for sugar gustatory receptors used in this study
	Gene	Sequence	Xu et al., 2017	Pearce et al., 2017	In this study
	Gr4	Nucleotide	KY806282.1	XM_021327184.1	OP251144
		Protein	ASW18693.1	XP_021182859.1
	Gr5	Nucleotide	KY806283.1	XM_021345811.1	OP251145
		Protein	ASW18694.1	XP_021201486.1
	Gr6	Nucleotide	KY806284.1	XM_021327785.1	OP251146
		Protein	ASW18695.1	XP_021183460.1
	Gr7	Nucleotide	KY806285.1	XM_021325184.1	OP251147
		Protein	ASW18696.1	XP_021180859.1
	Gr8	Nucleotide	KY806286.1	XM_021326422.1	OP251148
		Protein	ASW18697.1	XP_021182097.1
	Gr9	Nucleotide		XM_049843199
		Protein		XP_049699156
	Gr10	Nucleotide	KY806287.1	XM_021325160.1	OP251149
		Protein	ASW18698.1	XP_021180835.1
	Gr11	Nucleotide	KY806288.1	XM_021346090.1	OP251150
		Protein	ASW18699.1	XP_021201765.1
	Gr12	Nucleotide	KY806289.1	XM_021325173.1	OP251151
		Protein	ASW18700.1	XP_021180848.1
