# Supplementary material for: The larva and adult of Helicoverpa armigera use differential gustatory receptors to sense sucrose
Source: eLife. 2024 May 30;12:RP91711. doi: 10.7554/eLife.91711 (PMC11139476; doi:10.7554/eLife.91711)
Supplement: Supplementary file 2. — F: forward strand; R: reverse strand. [file elife-91711-supp2.xlsx]

## Sheet: Sheet1
	Supplementary file 2. The primer sequences used in PCR for full-length cloning of GRs
	Primer name	Primer sequences (5’–3’)
	Gr4F	ATGGAAATTAAGCTGTGTAAACTATTTG
	Gr4R	CTACTTATCATATTGTATTAAAACTAAT
	Gr5F	ATGCAAAATGGATGGAACAACGTTATC
	Gr5R	CTACTTAATAACACCACTGACAGACTC
	Gr6F	ATGGGGCAAACAAGTTTTAGAAG
	Gr6R	TTAAGTAGCTAGTGTTGTAATAGTG
	Gr7F	ATGTCAAGTCGAGGGTTCGGTCAAT
	Gr7R	CTATACTCCAATAGCATTCTTAGTC
	Gr8F	ATGTCGAGTAAGGAATTCAAACAATTTTTG
	Gr8R	TTAAGATGTTAGTAGCATTTAATGCTATCC
	Gr9F	ATGTTGTGGATAGAAACTC
	Gr9R	TCAGTTATCGTATCTTTGGAATTG
	Gr10F	ATGGAATATGGGTTAGATGCTAAAATTTC
	Gr10R	CTAGTTCTTGTTCAATTCGTCGCTGCTGA
	Gr11F	ATGCCATCGAAACTATTTCTCAAGACAT
	Gr11R	TTATCTGTTGAACTGTAGCAACACCAGT
	Gr12F	ATGAAAGTCCACCAACTGACGATGAGAA
	Gr12R	TTAACTGTAACTGTGCGAAGAAATATTT
	F: forward strand; R: reverse strand.
