# Supplementary material for: The larva and adult of Helicoverpa armigera use differential gustatory receptors to sense sucrose
Source: eLife. 2024 May 30;12:RP91711. doi: 10.7554/eLife.91711 (PMC11139476; doi:10.7554/eLife.91711)
Supplement: Supplementary file 3. — F: forward strand; R: reverse strand. [file elife-91711-supp3.xlsx]

## Sheet: Sheet1
	Supplementary file 3. The primer sequences used in qRT-PCR for for GR gene expression quantification
	Primer name	Primer sequences (5’–3’)
	Gr4F	GCGCATGGTGGATCGAAATC
	Gr4R	CAACACTACACTGCAGGCGCG
	Gr5F	AGATGCAAGCCAGAAATTGGA
	Gr5R	CTTGGATGCAGTGAGGGAGA
	Gr6F	TTCTGGAGAGCTACCCGTGA
	Gr6R	GGAGTGCATTCTCCTGTGCC
	Gr7F	GCAAAGTGGACGATGCCATC
	Gr7R	GTAGGCTGTCTTGATAGGCTC
	Gr8F	TACGTGAAGCAAGCGATGCTG
	Gr8R	ATCTGTGGACATCCCTTGCG
	Gr9F	AGAGGGCAAAAGAACCGAGG
	Gr9R	AGCTGCCGCGAGAATATCTC
	Gr10F	AAGGGAGGATTACACACGCG
	Gr10R	TCAGGTAAGCGGGGTAGGAAT
	Gr11F	GCGGCCTCCATAGTACTGTC
	Gr11R	TCCGGCTAGTAGGACAAGTGA
	Gr12F	CGAAACAATGGCCGAGGTT
	Gr12R	GTGCCATAGCAACGTAAGCG
	18S-F	CGTTGCTGGGAAGTTGACCA
	18S-R	CTTCCGCAGGTTCCCCTACG
	F: forward strand; R: reverse strand.
