# Supplementary material for: The larva and adult of Helicoverpa armigera use differential gustatory receptors to sense sucrose
Source: eLife. 2024 May 30;12:RP91711. doi: 10.7554/eLife.91711 (PMC11139476; doi:10.7554/eLife.91711)
Supplement: Supplementary file 4. — The italic sequences are protective bases, underline sequences are restriction enzymes, bold sequences are Kozak sequences. F: forward strand; R: reverse strand. [file elife-91711-supp4.xlsx]

## Sheet: Sheet1
	Supplementary file 4. The primer sequences used in cDNA synthesis for Xenopus oocytes expression system
	Primer name	Primer sequences (5’–3’)
	Gr4 (BamHI) F	CGGGATCCGCCACCATGGAAATTAAGCTGTGTAAACTATTTG
	Gr4 (XhoI) R	CCCTCGAGCTACTTATCATATTGTATTAAAACTAAT
	Gr5 (BamHI) F	GGATCCGCCACCATGCAAAATGGATGGAACAACGTTATC
	Gr5 (XhoI) R	CTCGAGCTACTTAATAACACCACTGACAGACTC
	Gr6 (EcoRI) F	GAATTCGCCACCATGGGGCAAACAAGTTTTAGAAGAAATATG
	Gr6 (Xbal) R	TCTAGATTAAGTAGCTAGTGTTGTAATAGTGTG
	Gr7 (EcoRI) F	CGGAATTCGCCACCATGTCAAGTCGAGGGTTCGGTCAAT
	Gr7 (XbaI) R	GCTCTAGACTATACTCCAATAGCATTCTTAGTC
	Gr8 (StuI) F	GAAGGCCTGCCACCATGTCGAGTAAGGAATTCAAACAATTTTTG
	Gr8 (XbaI) R	GCTCTAGATTAAGATGTTAGTAGCATTTAATGCTATCC
	Gr10 (BamHI) F	GGATCCGCCACCATGGAATATGGGTTAGATGCTAAAATTTC
	Gr10 (XhoI) R	CTCGAGCTAGTTCTTGTTCAATTCGTCGCTGCTGA
	Gr11 (BamHI) F	CGGGATCCGCCACCATGCCATCGAAACTATTTCTCAAGACAT
	Gr11 (XbaI) R	GCTCTAGATTATCTGTTGAACTGTAGCAACACCAGT
	Gr12 (BamHI) F	CGGGATCCGCCACCATGAAAGTCCACCAACTGACGATGAGAA
	Gr12 (XbaI) R	GCTCTAGATTAACTGTAACTGTGCGAAGAAATATTT
	The italic sequences are protective bases, underline sequences are restriction enzymes, bold sequences are Kozak sequences. F: forward strand; R: reverse strand.
