# Supplementary material for: The larva and adult of Helicoverpa armigera use differential gustatory receptors to sense sucrose
Source: eLife. 2024 May 30;12:RP91711. doi: 10.7554/eLife.91711 (PMC11139476; doi:10.7554/eLife.91711)
Supplement: Supplementary file 5. — F: forward strand; R: reverse strand. [file elife-91711-supp5.xlsx]

## Sheet: Sheet1
	Supplementary file 5. The primer sequences used in the experiments of Gr10 and Gr6 mutants establishment
	Primer name	Primer sequences (5’–3’)
	For sgRNA synthesis
	sgGr6F	TAATACGACTCACTATAGGAACAGCATCATCGTCACGC
	sgGr6R	TTCTAGCTCTAAAACGCGTGACGATGATGCTGTTC
	sgGr10F	TAATACGACTCACTATAGGGCTTTCCAAAAAGCGATGA
	sgGr10R	TTCTAGCTCTAAAACTCATCGCTTTTTGGAAAGCC
	For mutation detection
	mGr6F	CACCAGTAATATTCTACGTAACCACC
	mGr6R	AAACCTTCGTAAGTATCCATTCCTGA
	mGr10F	CGAAGGAATTAGAAAGTATCAATTTC
	mGr10R	CTTTCTGTAGTATACCAGTC
	For deletion confirmation
	dGr6F	TACTCGTTGCTGTCGCTCAT
	dGr6R	CCCGCAAATGCTGATAATAGGG
	dGr10F	GGGTTAGATGCTAAAATTTCGAAGGA
	dGr10R	CATCAACGACGGCCATTTTGA
	For off-target detection
	Gr6F	ATAGAACGTGAACGGAGGGC
	Gr6R	CGTCAGACCCGTAGGTATGC
	F: forward strand; R: reverse strand.
