# Supplementary material for: The larva and adult of Helicoverpa armigera use differential gustatory receptors to sense sucrose
Source: eLife. 2024 May 30;12:RP91711. doi: 10.7554/eLife.91711 (PMC11139476; doi:10.7554/eLife.91711)
Supplement: Supplementary file 6. [file elife-91711-supp6.xlsx]

## Sheet: Sheet1
	Supplementary file 6. Summary of the CRSPR/Cas9 directed mutation rates from G0 to G2 in the establishment of Gr10 and Gr6 mutants
	Mutant	Injected embryo	Chimeras rate in G0	Grn/- rate in G1	Gr-/- rate in G2
	Gr10-/-	732	15/125 (12%)	24/57 (42.1%)	53/254 (20.8%)
	Gr6-/-	695	12/132 (9.1%)	19/66 (28.7%)	42/200 (21%)
